# Conditioning by Subthreshold Synaptic Input Changes the Characteristic Firing Pattern of CA3 Hippocampal Neurons

Saray Soldado-Magraner<sup>1\*</sup>, Federico Brandalise<sup>2\*</sup>, Suraj Honnuraiah<sup>1</sup>, Michael Pfeiffer<sup>1</sup>, Urs Gerber<sup>2</sup>, Rodney Douglas<sup>1</sup>

<sup>1</sup>*Institute of Neuroinformatics, University of Zurich and ETH Zurich, Switzerland*

<sup>2</sup>*Brain Research Institute, University of Zurich, Switzerland*

*\*These authors contributed equally to this work*

**Running title:** Subthreshold Input Changes CA3 Firing Patterns

**Corresponding Author:**

Saray Soldado-Magraner  
Institute of Neuroinformatics  
University of Zurich and ETH Zurich  
Winterthurerstrasse 190  
CH-8057 Zurich  
Switzerland  
ssaray@ini.uzh.ch

**Number of, pages: 44**

**Number of figures: 10**

**Number of tables: 1**

**Number of words Abstract: 217**

**Number of words Introduction: 648**

**Number of words Discussion: 1445**

**Conflict of Interest:** The authors declare no competing financial interests.

**Acknowledgements:** This work was supported by EU SECO grant EU216593 and ETH grant 2-73246-8 to Kevan A. C. Martin, Swiss National Science Foundation grant 31003A-143373 / 1 to U. Gerber and UZH Forschungskredit grant FK-18-119 to S. Soldado-Magraner. We thank Kevan Martin for critical comments on the manuscript, Beat Gähwiler for useful discussions, Ladan Egolf and Fritjof Helmchen for the help with the licences, Dubravka Göckeritz-Dujmovic for all the technical assistance, and Gabriela Michel and Marion Betizeau for proofreading the manuscript.

## 1 **Abstract**

2 The action potential discharge dynamics of neurons has conventionally been measured using somatic injection of  
3 step currents. Different morphological types of neurons are considered to have characteristic firing responses and  
4 therefore, these responses have been used for phenotypic classification. However, neuronal excitability is subject  
5 to homeostasis at both network and single neuron level, suggesting that discharge patterns should also be subject to  
6 change. In this study, we show that the firing patterns of neurons in the CA3 field of the rat hippocampus in vitro change  
7 significantly after only a few minutes of low frequency subthreshold stimulation of the neuron's afferents. This effect,  
8 which was long-term, could be reproduced by subthreshold somatic depolarizing pulses and was blocked by kinase  
9 inhibitors, indicating that discharge dynamics are modulated locally. Cluster analysis of the firing patterns before and  
10 after conditioning revealed systematic transitions towards adapting and intrinsic burst behaviours, irrespective of the  
11 patterns initially exhibited by the cells. Using a conductance-based model and subsequent pharmacological blocking,  
12 we demonstrate that the experimental transitions can be mediated by a recruitment of calcium and M-type potassium  
13 conductances. We conclude that CA3 neurons adapt their conductance profile to the statistics of subthreshold activity  
14 in their embedding circuits, making their intrinsic firing pattern not a constant signature, but rather the reflection of  
15 their history of activity.

## 16 **Significance Statement**

17 Different anatomical types of neuron express a characteristic action potential discharge pattern in response to intra-somatic  
18 injections of step currents. Together with the cell's morphology and molecular markers, these patterns have been used  
19 to classify neuronal phenotypes. However, we show that in the case of hippocampal CA3 neurons, this discharge  
20 pattern is not as characteristic as generally assumed. Instead, they modify their fundamental processing according  
21 to the subthreshold signals that they receive from their embedding circuit. This result implies that CA3 neurons  
22 collectively adapt their network processing, and also that their discharge response patterns cannot be used for phenotypic  
23 classification.

## 24 **Introduction**

25 It is widely accepted that the diversity of morphological, molecular, and electrophysiological properties exhibited  
26 by neurons of the neocortex and hippocampus reflects functionally distinct classes of cells (Ramón y Cajal, 1893;  
27 McCormick et al., 1985; Ren et al., 1992; DeFelipe, 1993; Kawaguchi and Kubota, 1997; Markram et al., 2004;  
28 Somogyi and Klausberger, 2005). Therefore, neurons have been classified electrophysiologically according to the  
29 pattern of their action potential discharge in response to applied intra-somatic step currents (Connors and Gutnick,  
30 1990; Cauli et al., 2000; Markram et al., 2004; Butt et al., 2005; Dumitriu et al., 2007; Hemond et al., 2008; Tasic  
31 et al., 2016). These responses may be for example: adapting, accelerating, bursting, or fast spiking. With some  
32 exceptions (Steriade, 2004), the patterns are assumed to be a sufficiently stable property of a neuron to be used as  
33 a basis for phenotypic classification (Markram et al., 2004; Ascoli et al., 2008; Tricoire et al., 2011; Van Aerde and  
34 Feldmeyer, 2015).

35 However, there are substantial reasons to doubt that firing patterns are static properties of neurons. The discharge  
36 dynamics depends on the distribution and activations of the membrane conductances that it expresses (Hille, 2001;  
37 Markram et al., 2004). This distribution is subject, over the course of hours and days, to homeostatic control via  
38 up- or down-regulation of conductances in response to the neuron's own activity (Turrigiano et al., 1994; Turrigiano  
39 and Nelson, 2004; Marder and Goaillard, 2006). Furthermore, neurons have conserved molecular pathways that  
40 link network activity to the recruitment of genes and signaling factors implicated in neural excitability (Flavell and  
41 Greenberg, 2008; Cohen and Greenberg, 2008), and activity-dependent maturation is necessary for the emergence of  
42 the whole spectrum of electrical types (Moody and Bosma, 2005; García et al., 2011). These lines of evidence suggest  
43 that the firing pattern is not a static characteristic of the cell, but rather the consequence of adaptive mechanisms  
44 that adjust the behavior of the neuron in response to the patterns of activity in its embedding network. In fact, some  
45 studies show that specific features of the discharge response are actually modulated homeostatically upon activity or  
46 after learning. For example, the spike delay (Cudmore et al., 2010; Dehorter et al., 2015) or the accommodation rate  
47 (Thompson et al., 1996). On faster time scales, changes in intrinsic excitability have also been well characterized  
48 (Aizenman and Linden, 2000; Paz et al., 2009; Mahon and Charpier, 2012; Brager and Johnston, 2007). These shifts

49 are postulated to increase the probability of firing, integrating neurons into memory engrams (Zhang and Linden, 2003;  
50 Titley et al., 2017). However, the fact that key conductances with potential impact on the discharge pattern have also  
51 been found to be rapidly modulated by activity (Belmeguenai et al., 2010; Hyun et al., 2013; Brown and Randall,  
52 2009) suggests neurons may be doing more than just increasing their overall excitability. Despite the evidence, it  
53 remains unexplored whether ongoing activity can impact not just specific features of the discharge or its average rate,  
54 but the whole spectrum of firings classically described (Ascoli et al., 2008).

55 We have addressed this issue by studying the effect that subthreshold activity has on the suprathreshold response of  
56 neurons using whole-cell recordings in the CA3 region of the rat hippocampus in organotypic cultures. The discharge  
57 patterns were characterized before and after a conditioning phase of periodic subthreshold synaptic stimulation lasting  
58 a few minutes. Pre-conditioned cells presented diverse discharge patterns (Ascoli et al., 2008). However, conditioning  
59 by subthreshold synaptic input elicited significant long-lasting changes in the behavior of most of the neurons examined,  
60 requiring substantial re-classification of their type. This effect was reproduced when conditioning the cells via  
61 subthreshold intra-somatic current pulses and was blocked by adding protein kinase A (PKA) and protein kinase C  
62 (PKC) inhibitors to the recording pipette, suggesting that changes are mediated at the single cell level via phosphorylation.  
63 Using a conductance-based neuron model and the channel blockers *XE991* and *NiCl<sub>2</sub>* we found that the results can  
64 be explained by a recruitment of voltage dependent calcium and M-type potassium conductances. We conclude that  
65 CA3 neurons rapidly adapt their firing response by tuning their conductance profile to the subthreshold inputs of their  
66 embedding circuit.

## 67 **Materials and Methods**

68 All experiments were conducted in accordance with the guidelines and regulations of the Cantonal Veterinary Office  
69 of Zurich; License Nr 81/2014, 89/2013, 70/2016 and 156/2017.

## 70 Electrophysiological Recordings

71 Rat hippocampal organotypic cultures (Gähwiler, 1981) of average postnatal age 21 days were transferred to a recording  
72 chamber and mounted on an upright microscope (Axioskop FS1; Zeiss). The cultures were superfused with an external  
73 solution (pH 7.4) containing (in *mM*) 148.8  $Na^+$ , 2.7  $K^+$ , 149.2  $Cl^-$ , 2.8  $Ca^{2+}$ , 2.0  $Mg^{2+}$ , 11.6  $HCO_3^-$ , 0.4  $H_2PO_4^-$ ,  
74 5.6 D-glucose, and 10 *mg/l* Phenol Red. All experiments were performed at 34°C. Whole-cell recordings of CA3  
75 neurons were obtained with patch pipettes (4-7 *MΩ*). Pipettes were filled (in *mM*) with 126 *K*-gluconate, 4 *NaCl*,  
76 1 *MgSO*<sub>4</sub>, 0.1 *BAPTA – free*, 0.05 *BAPTA – Ca*<sup>2+</sup>, 15 glucose, 3 *ATP*, 5 *HEPES* (*pH* was adjusted to 7.2 with  
77 *KOH*) 0.1 *GTP*, and 10.4 byocitin. For acute experiments, 300  $\mu$ m sagittal hippocampal slices were prepared from  
78 mice ranging 15 to 22 days old. After decapitation under isoflurane anesthesia, the brain was removed and placed in  
79 oxygenated (95%  $O_2$ , 5%  $CO_2$ ) and ice-cold high-sucrose artificial cerebrospinal fluid (ACSF) (pH 7.4) containing (in  
80 *mM*) 75 sucrose, 87 *NaCl*, 2.5 *KCl*, 7 *MgSO*<sub>4</sub>, 0.5 *CaCl*<sub>2</sub> 26 *NaHCO*<sub>3</sub>, 1 *NaH*<sub>2</sub>*PO*<sub>4</sub>, and 10 D-glucose. Slices were cut  
81 in this solution and then transferred for recovery to oxygenated ACSF (*pH*7.4) at 37°C containing (in *mM*) 119 *NaCl*,  
82 2.5 *KCl*, 1.3 *MgSO*<sub>4</sub>, 2.5 *CaCl*<sub>2</sub> 26 *NaHCO*<sub>3</sub>, 1.25 *NaH*<sub>2</sub>*PO*<sub>4</sub>, and 10 D-glucose. After 30 min of recovery, slices  
83 were kept at room temperature for 1 hour before recording. During recording, slices were superfused with oxygenated  
84 ACSF.

85 The recording pipettes were manually positioned under microscope control. Recorded neurons were located mostly in  
86 the pyramidal cell layer. Electrophysiology and subsequent histology in a subset of the cells recorded suggest that the  
87 neurons described below include mostly pyramidal cells but also a subset of smooth cells.

88 Current-voltage relationships were determined by step command potentials and had duration of 1 second to ensure  
89 steady-state responses. Data were recorded using an Axopatch 200B amplifier (Molecular Devices). Series resistance  
90 was monitored regularly, and was typically between 5 and 15 *MΩ*. Cells were excluded from further analysis if this  
91 value changed by more than 20% during the recording. Junction potential and bridge was not corrected.

92 Mossy fibers were stimulated with a bipolar tungsten electrode. The intensity of the stimulus was constantly adjusted  
93 to evoke subthreshold post-synaptic potential responses of 15 mV on average in the recorded neuron.

94 Action potential discharges were evoked by injected current steps (-0.08 up to 1.8 nA; step increment 0.05 - 0.15 nA,  
95 depending on the input resistance of the recorded cell) each lasting from 3 to 5 seconds. After this control, the neurons  
96 were conditioned by mossy fibers activation, consisting of a double pulse (0.1 ms duration pulses, interval 10 - 20 ms)  
97 at a frequency of 1 Hz, repeated 500 times. Thus, the conditioning period was approximately 8 minutes. In a subset of  
98 experiments an interval of 60 ms was used. Immediately after this conditioning, the firing pattern of the neuron was  
99 assessed again using the same step protocol. The firing pattern of these cells was assessed every 10 minutes until 40  
100 minutes of recording were completed to assess long-term effects of the plasticity. In a another subset of experiments,  
101 mossy fiber subthreshold responses were mimicked by injecting somatically and at a frequency of 1 Hz double step  
102 current pulses of 50 ms of duration and 20 ms of interstep interval. The amplitude of the pulse was adjusted in order  
103 to get a depolarization of 15 mV on average.

#### 104 **Pharmacology**

105 All drugs were applied to the slices via the perfusion system. Calcium currents were blocked by applying  $NiCl_2$  at 200  
106  $\mu M$ . D-type currents (Kv1 channels) were blocked by application of low concentrations (30  $\mu M$ ) of 4-aminopyridine  
107 (4-AP). The M-current was blocked by application of XE991 at 10  $\mu M$ , which targets  $Kv7/KCNQ$  channels (Brown  
108 and Randall, 2009). 4-AP,  $NiCl_2$  and XE991 were purchased from Sigma-Aldrich (A78403, 339350, X2254). Times  
109 indicated in the figures refer to the time elapsed since starting of the drug perfusion. The timing for the drug to reach  
110 the bath was estimated of 3-4 minutes.

#### 111 **Histology**

112 Hippocampal slice cultures were prepared for morphological assessment by fixing in freshly prepared 4% paraformaldehyde  
113 in 0.1 M phosphate buffer (PB) at pH 7.4 overnight at 4 °C; washing three times in phosphate-buffered saline (PBS, 1.5  
114 mM  $KH_2PO_4$ , 8.5 mM  $Na_2HPO_4$ , 137 mM NaCl, and 3 mM KCl, pH 7.4); and permeabilizing at room temperature  
115 in PBS that contained 10% heat-inactivated donkey serum, and 1% Triton X-100. Then they were incubated overnight  
116 at 4 °C with streptavidin conjugated with Alexa (546λ). The cultures were washed again three times in PBS, and then  
117 mounted in Fluorostab (Bio-Science Products AG, Emmenbrucke, Switzerland) and coverslipped. High-resolution

118 images were obtained using laser scanning confocal microscopy (Leica TCS SP2, Leica Microsystems, Heidelberg,  
119 Germany).

## 120 **Data analysis**

121 Signals were digitized at 10 kHz and analyzed off-line using pCLAMP 10 (Molecular Devices) and Matlab (MathWorks).  
122 Analysis of the voltage traces was performed similar to Chen et al. (2015). The average resting membrane potential  
123 of each neuron was estimated as the mean membrane potential during the first 100 ms of current-injection protocol  
124 (before injection of the step-current pulses). Input resistance was obtained by measuring the voltage drop across  
125 the hyperpolarizing trace of the step-current pulses. APs were located using median filtering, and the threshold was  
126 inferred as the point at which the derivative of the voltage trace exceeded 5 mV/ms. AP amplitude was measured from  
127 threshold-to-peak and AP afterhyperpolarization (AHP) from the threshold to trough. Half-width was estimated as  
128 the full width at half-maximal amplitude. The fraction of spikes of a cell at a given time was computed by calculating  
129 the mean of the fraction of spikes of the individual current injections. At the population level the mean of this quantity  
130 was calculated.

## 131 **Experimental Design and Statistical Analysis**

132 Two conditions were designed for statistical comparison. The firing pattern of the cell was assessed in control  
133 conditions and after a period of conditioning (see first section of the Methods). Two different conditioning protocols  
134 were tested, synaptic and somatic. As a control, two similar experiments were performed: in one the cell was recorded  
135 for 15 minutes without conditioning (and the firing pattern tested thereafter) and in a second set of experiments the  
136 firing pattern was analyzed at different holding potentials. For any set of experiments, 1 cell per slice was recorded  
137 and 6 slices per rat on average (of either sex) were used for preparation of the organotypic cultures. A minimum of 8  
138 cells were used for each set of experiments. Data was tested for normality using a one-sample Kolmogorov-Smirnov  
139 test. A paired t-test was used for statistical comparisons between conditions with normally distributed data and a  
140 two-sided Wilcoxon signed rank test was used otherwise. The exact p-values of the tests and the sample number for  
141 each experiment are indicated on the figure legends in the results section. A clustering analysis was also performed

142 for the synaptic conditioning group, and it is described on the following section. All the statistical analysis were  
143 performed using Matlab (MathWorks).

#### 144 **Cluster analysis of discharge traces**

145 The firing patterns of the neurons were categorized by hierarchical clustering of their discharge patterns. The dataset  
146 consisted of all voltage traces recorded from neurons in response to step-wise current injections with different amplitudes,  
147 including recordings before and after conditioning. For any one neuron, the collection of responses to different current  
148 injections represents the signature of the electrical type. However, for inherent verification of our cluster procedure,  
149 we chose to treat each response independently. In this way successful clustering could be confirmed by its ability to  
150 assign responses from the same neuron into the same category.

151 The clustering measured similarity of a feature vector derived from the voltage traces. First the recorded voltage traces  
152 were converted into a time series of the instantaneous firing rates. The instantaneous firing rate at each spike was  
153 taken as  $1/\text{Inter-spike-Interval (ISI)}$ . Then the instantaneous rates were linearly interpolated across the spike times at  
154 1 ms time intervals over 6 seconds (5 second current injection step, plus 1 second on and offset), and normalized by  
155 the maximum firing rate. Finally, a characteristic feature vector of a common length of 600 elements was obtained by  
156 down-sampling the interpolated rate traces by a factor of 10, in order to make them computationally tractable to the  
157 similarity measurement.

158 Similarity distances between pairs of traces were calculated using the Dynamic Time Warping (DTW) measure (Berndt  
159 and Clifford, 1994). DTW takes into account that two similar signals can be out of phase temporarily, and aligns them  
160 in a non-linear manner through dynamic programming (Keogh and Ratanamahatana, 2005). The algorithm takes two  
161 time series  $Q = \langle q_1, q_2, \dots, q_n \rangle$  and  $C = \langle c_1, c_2, \dots, c_m \rangle$  and computes the best match between the sequences by finding  
162 the path of indices that minimizes the total cumulative distance

$$\text{DTW}(Q, C) = \min \sum_{k=1}^K w_k \quad (1)$$



163 where  $w_k$  is the cost of alignment associated with the  $k^{th}$  element of a warping path  $W$ . A warping path starts at  $q_1$   
164 and  $c_1$  respectively, and finds a monotonically increasing sequence of indices  $i^k$  and  $j^k$ , such that all elements  $q_i$  in  
165  $Q$  and  $c_j$  in  $C$  are visited at least once, and for the final step of the path  $i^{end} = n$  and  $j^{end} = m$  holds. The optimal  
166 DTW distance is the cumulative distances  $y(i, j)$ , corresponding to the costs of the optimal warping path  $\langle q_1, \dots, q_i \rangle$   
167 and  $\langle c_1, \dots, c_j \rangle$ . This distance can be computed iteratively by dynamic programming:

$$y(i, j) = d(q_i, c_j) + \min\{y(i-1, j-1), y(i-1, j), y(i, j-1)\} \quad (2)$$

168 where  $d(q_i, c_j)$  is the absolute difference between the elements of the sequence. The optimal warping path is obtained  
169 by backtracking from the final element  $y(n, m)$ , and finding which of the three options (increasing  $i$  only, increasing  $j$   
170 only, or increasing  $i$  and  $j$  simultaneously) led to the optimal warping distance, until  $i = 1, j = 1$  is reached. A warping  
171 window constraint of 10% of the vector size was chosen (Keogh and Ratanamahatana, 2005).

172 The pairwise DTW distances were used to perform hierarchical clustering by Ward's algorithm (Ward Jr, 1963). The  
173 number of classes increases with the level of the hierarchy. We choose to cut the tree at a level that provided sufficient  
174 structure to interpret the hierarchy in terms of recognized response types (Ascoli et al., 2008).

175 Every recording for a given cell was treated as an independent observation, and could in principle be assigned to any  
176 cluster. If the electrophysiological state of the cell is expressed in all of its responses, then we expect that all the  
177 independent observations derived from that cell should be assigned to the same cluster. However, traces derived from  
178 current injections to the same cell in different conditions (pre- or post-stimulation) are expected to be assigned to  
179 different clusters if there is significant change in the underlying electrophysiological state.

180 In fact the independent traces did not cluster perfectly. Instead, the majority of independent observations derived  
181 from a given state clustered together and there were a few that fell into other clusters. Therefore, we chose to label  
182 the electrical type of each cell according to the cluster that contained the mode of the traces for one set of current  
183 injections. Cells for which no clear dominant cluster could be identified, e.g. because half of the traces fell into one

184 cluster, and half of them into another, were labeled as unclassified. A cluster transition was recognized whenever the  
185 cell was assigned to different clusters before and after the stimulation protocol.

186 The analysis was performed using custom-written software in MatlabR2011b. The implementation of the DTW  
187 algorithm was obtained from Matlab Central [http://www.mathworks.com/matlabcentral/fileexchange/](http://www.mathworks.com/matlabcentral/fileexchange/43156-dynamic-time-warping-dtw)  
188 43156-dynamic-time-warping-dtw.

### 189 **Neuron simulation model**

190 A single cylindrical compartment, conductance-based neuronal model was used for all simulations. The length and  
191 diameter of the cylinder are set at equal dimensions to avoid spatial discretization problems in a single compartment  
192 (Cooley and Dodge, 1966; De Schutter and Bower, 1994). The passive properties associated with the model were  
193 obtained from Hemond et al. (2008). We set the length and diameter of our compartment to 50  $\mu\text{m}$ . The active  
194 properties were modeled by including appropriate voltage and calcium gated ion channels whose density and kinetics  
195 were obtained from experimental recordings performed in CA3 neurons (Hemond et al., 2008). All the conductances  
196 included in the model were obtained from this work, except for  $gKd_{slow}$ , which had to be added in order to match the  
197 accelerating traces. We found that a 10 fold increase in the time constant of inactivation of  $gKd$  significantly improved  
198 the accelerating index. A similar slow  $gKd$  current matching these kinetics has actually been found in CA3 neurons  
199 (Luthi et al., 1996). The faster  $Kd$  current, has been previously reported both in cortex and hippocampus (Storm, 1988;  
200 Cudmore et al., 2010; Hyun et al., 2013; Miller et al., 2008). Throughout the manuscript, we refer to the channels  
201 as conductances. The simulations were performed using NEURON (Hines and Carnevale, 1997). We choose an  
202 integration step of 25  $\mu\text{s}$ , which was approximately 1% of the shortest time constant in the model. The voltage- and  
203 time-dependent currents followed the Hodgkin and Huxley formalism (1952):

$$C \cdot \frac{dV}{dt} = -(I_{Na} + I_{Kdr} + I_{Kd} + I_{KA} + I_{Km} + I_{CaK} + I_{CaL} + I_{CaT} + I_{CaN} + I_{Leak}) \quad (3)$$

204 Each current  $I_x$  is described by the equation

$$I_{(v,t)} = \bar{g} \cdot m \cdot h \cdot (V_{(t)} - E) \quad (4)$$

205 where  $\bar{g}$  is the maximal conductance,  $m$  and  $h$  are activation and inactivation terms,  $V$  is the membrane potential, and  
206  $E$  the reversal potential of the channel. The reversal potentials for  $Na^+$  and  $K^+$  were  $E_{Na} = 50$  mV and  $E_K = -85$   
207 mV, respectively. The equations describing the different channel kinetics ( $m, h$ ) for every current were obtained from  
208 Hemond et al. (2008). Following this reference, the three calcium conductances (T, N and L) were incorporated into  
209 a single parameter  $gCa$ .

210 The intracellular calcium dynamics were modeled as originally described by Hemond et al. (2008):

211

$$\frac{d[Ca^{2+}]_i}{dt} = \frac{I_{Ca}}{2Fv} - \frac{[Ca^{2+}]_i - 0.0001}{\tau_{Ca}} \quad (5)$$

212 The first term of the above equation describes the change caused by  $Ca^{2+}$  influx into a compartment with volume  $v$ .  $F$   
213 is the Faraday constant,  $I_{Ca}$  is the calcium current and  $\tau_{Ca}$  is the time constant of  $Ca^{2+}$  diffusion.

214 The occasional decrease in spike amplitude seen in some of the experimental traces is probably due to sodium  
215 inactivation. We choose not to include this feature in the model, because it does not affect the overall dynamics  
216 of the spike discharge itself.

217 The model is available online at ModelDB [https://senselab.med.yale.edu/ModelDB/enterCode.](https://senselab.med.yale.edu/ModelDB/enterCode.cshtml?model=228599)  
218 [cshtml?model=228599](https://senselab.med.yale.edu/ModelDB/enterCode.cshtml?model=228599)

## 219 **Model Database of Traces**

220 In order to get a conductance estimate for every voltage trace, we used the DTW algorithm to find the best fit to a  
221 database of voltage traces generated by the model. We varied the maximal conductances of our model into ranges  
222 that would contain our observed set of experimental voltage traces. The spiking conductances were left constant and

| Conductances and Current  | Employed ranges                     |
|---------------------------|-------------------------------------|
| $g_{Na}$                  | 0.04                                |
| $g_{Kdr}$                 | 0.01                                |
| $g_{Ka}$                  | 0.05                                |
| $g_{Ca}$                  | $1e^{-6} + (0 : 1e^{-4} : 9e^{-4})$ |
| $g_{CaK}$                 | $1e^{-6} + (0 : 1e^{-4} : 9e^{-4})$ |
| $g_{Km}$                  | $1e^{-6} + (0 : 1e^{-4} : 9e^{-4})$ |
| $g_{Kd}$                  | $1e^{-6} + (0 : 1e^{-4} : 9e^{-4})$ |
| $g_{Kd_{slow}}$           | $1e^{-6} + (0 : 1e^{-4} : 9e^{-4})$ |
| $I$                       | 0.2 : 0.16 : 1.32                   |
| Total conductance vectors | 100'000                             |
| Total traces              | 800'000                             |

**Table 1. Range of maximal conductance values used to generate the model database of voltage traces.** A model database of voltage traces, which includes all the observed experimental firing patterns, was generated by varying 5 maximal conductances ( $g_{Ca}$ ,  $g_{CaK}$ ,  $g_{Km}$ ,  $g_{Kd}$  and  $g_{Kd_{slow}}$ ) over a given range. Different ranges of step current  $I$  were also needed to reveal the different firing types. A total of 100'000 conductance vectors were generated by combining the different conductances. The firing pattern of every conductance vector was produced at several levels of step-current injection, obtaining a total of 800'000 voltage traces. Note that  $g_{CaT}$ ,  $g_{CaN}$  and  $g_{CaL}$  are englobed under the single parameter  $g_{Ca}$ .

223  $gCa$  ,  $gCaK$  ,  $gKm$  ,  $gKd$  and  $gKd_{slow}$  were varied. The search of a valid conductance space was done manually,  
224 with the starting values provided by the report of Hemond et al. (2008) to reproduce CA3 firings. For the values  
225 and ranges used to generate the database see Table 1. A total of 100'000 conductance vectors were generated by  
226 combining the different conductances. The firing pattern of every conductance vector was produced at 8 different  
227 levels of step-current injection, obtaining a total of 800'000 voltage traces. An integration step of 0.2 ms was used.  
228 After generating the database non-spiking traces were removed, together with traces with saturating spikes. This  
229 led to a total of 73'024 voltage traces composing the conductance database. Every experimental trace, for both the  
230 control and conditioned case, was compared pairwise using the DTW algorithm with the set of voltage traces from  
231 the database. The 10 best fits were then selected in order to have an estimate of the conductance composition of the  
232 experimental trace.

233 The firing pattern of the model traces was simulated using 1 second of step current duration. Note that this differs from  
234 the time scale of our experimental traces, which were unraveled at 3-5 seconds of step current. Although generation  
235 of the traces for this longer duration was possible, the resulting firing patterns did not reproduce faithfully all the  
236 spiking dynamics encountered in the experiments. A change in channel kinetics (Hemond et al., 2008), an additional  
237 conductance, or a dendritic load could possibly solve the issue. The objective however was to gain an intuition on the  
238 possible conductance distribution changes induced by the conditioning. This together with computational reasons to  
239 generate the database led us to proceed with the simulations using a 1 second current step.

## 240 **Results**

### 241 **Firing patterns of CA3 neurons change after subthreshold synaptic stimulation**

242 Whole-cell patch clamp recordings of CA3 neurons were performed in rat hippocampal organotypic cultures. The  
243 intrinsic firing patterns of the neurons were recorded before and after conditioning by extracellular stimulation of  
244 the mossy fibers (MF) originating in the dentate gyrus. The conditioning stimuli consisted of paired pulses (0.1  
245 ms duration pulses, with an interval of 10 – 20 ms) applied at 1 Hz, and repeated 500 times for a total period of  
246 approximately 8 minutes. The amplitude of the pulses was adjusted for each recorded cell to elicit only subthreshold

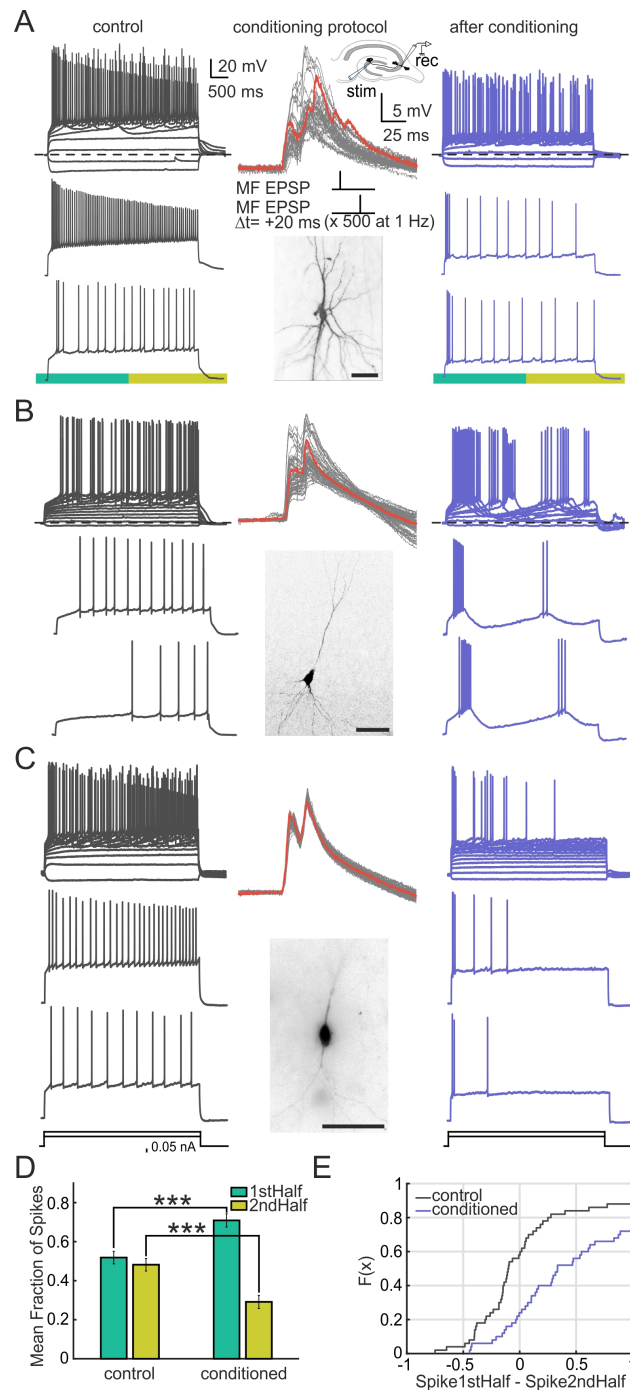

**Figure 1. Firing pattern transitions occur in CA3 neurons after subthreshold paired-pulse stimulation of afferents.** A-C) Three examples of neurons in the CA3 area presenting different morphologies and different firing patterns in control conditions. The discharge patterns were measured by injection of step currents of increasing amplitude. Control measurements (grey traces, left) were followed by stimulation of the mossy fibers. The upper trace shows all voltage traces elicited upon different levels of current injection on that cell. Two sample traces of this set are shown below. EPSPs (middle panel) were evoked in response to a stimulation with double current pulses, separated by 20 ms and repeated 500 times at 1 Hz. The series of repeated pulses are shown superimposed. The median trace is highlighted in red. The inset shows the configuration of recording and stimulating electrodes (on the CA3 region of the hippocampus and on the dentate gyrus, respectively). Below, the morphology obtained by labeling the cells with biocytin is shown. After the conditioning, patterns were measured again (blue traces, right). A) Pyramidal cell switches from non-adapting burst to intrinsic burst firing. B) Pyramidal cell switches from delay accelerating to intrinsic burst continuous pattern. C) Bipolar cell switches from non-adapting continuous to adapting continuous firing (scale bars = 50  $\mu$ m). D) Mean fraction of spikes for the population in the first and second half of the voltage trace (see green and yellow rectangle below the trace in A for an example) for both control and conditioned cases. A significant redistribution on the fraction of spikes is observed after the conditioning, where the fraction of spikes on the first half is increased while it decreases in the second half (n=50, p=1.92e-6, two-sided Wilcoxon signed rank test). E) Empirical cumulative distribution function for the data shown in D. Every individual cell, for both control and conditioned cases, is represented as the number of spikes for the first half of the trace minus the spikes for the second half (n=50)

247 excitatory post-synaptic potentials (EPSPs). This mossy fiber stimulation protocol is a modification of that described  
248 by Brandalise and Gerber (2014) and Brandalise et al. (2016), which has been previously shown to elicit heterosynaptic  
249 subthreshold plasticity in CA3 pyramidal-pyramidal synapses. We tested whether the same type of subthreshold  
250 stimulation could also induce plasticity on the action potential discharge patterns of the CA3 cells. The firing patterns  
251 of neurons were assessed with a sequence of constant current injections. For convenience, we label these patterns  
252 according to the Petilla classification terminology (Ascoli et al., 2008). Interestingly, we observed that for most  
253 neurons the conditioning protocol elicited a change in the Petilla discharge pattern, independently of their type of  
254 firing on control conditions. For example, the pyramidal cell shown in Figure 1A had a non-adapting burst pattern  
255 before stimulation (grey traces) but after conditioning (blue traces), this response changed to intrinsic burst. The same  
256 transition was observed for the pyramidal cell on Figure 1B, whose initial pattern was delayed accelerating. The  
257 bipolar cell on Figure 1C switched from non-adapting continuous to adapting continuous firing. The most common  
258 transition was towards adapting and intrinsic burst patterns. This observation is supported by measuring the mean  
259 fraction of spikes in the first half versus the second half of the voltage traces for the population of recorded cells. The  
260 distribution of the spikes favors the first half (Figures 1D-E) ( $n=50$ ), supporting our observation that the main pattern  
261 transitions are towards adapting and intrinsic burst behaviors after the conditioning.

262 The mossy fiber conditioning was followed by a significant  $36 \text{ M}\Omega$  (25%) decrease in input resistance ( $R_{in}$ ), (from  
263  $144.8 \pm 73.0 \text{ M}\Omega$  to  $108.4 \pm 65.3 \text{ M}\Omega$ , two-sided Wilcoxon signed rank test,  $p=1.1e-5$ ), while there was no significant  
264 change in rheobase (from  $0.36 \pm 0.32 \text{ nA}$  to  $0.3 \pm 0.6 \text{ nA}$ , two-sided Wilcoxon signed rank test,  $p=0.59$ ). There was  
265 also a significant  $5 \text{ mV}$  (7%) depolarization of the resting membrane potential ( $V_m$ ) ( $-65.3 \pm 5.0 \text{ mV}$ ) with respect  
266 to resting level ( $-70.4 \pm 5.7 \text{ mV}$ , two-sided Wilcoxon signed rank test,  $p=2.3e-5$ ,  $n = 50$ ). However, the firing pattern  
267 transitions could not be induced by simply clamping the membrane potential at different values (see Figure 2D and  
268 F,  $n = 10$ ), nor could they be induced by the step-currents used to measure the discharge patterns (see Figure 2A-C,  $n$   
269  $= 15$ ). No significant changes in  $V_m$  or  $R_{in}$  were found in unconditioned cells ( $V_m$ :  $-69.3 \pm 2.0 \text{ mV}$ ,  $-69.1 \pm 1.9 \text{ mV}$ ,  
270 paired t-test,  $p=0.64$ ,  $R_{in}$ :  $148.8 \pm 56.1 \text{ M}\Omega$ ,  $158.9 \pm 55.6 \text{ M}\Omega$ , paired t-test,  $p=0.063$ ,  $n = 15$ ). Intracellular dialysis  
271 could also be excluded as the cause of the pattern transitions, as firings did not change spontaneously over intracellular

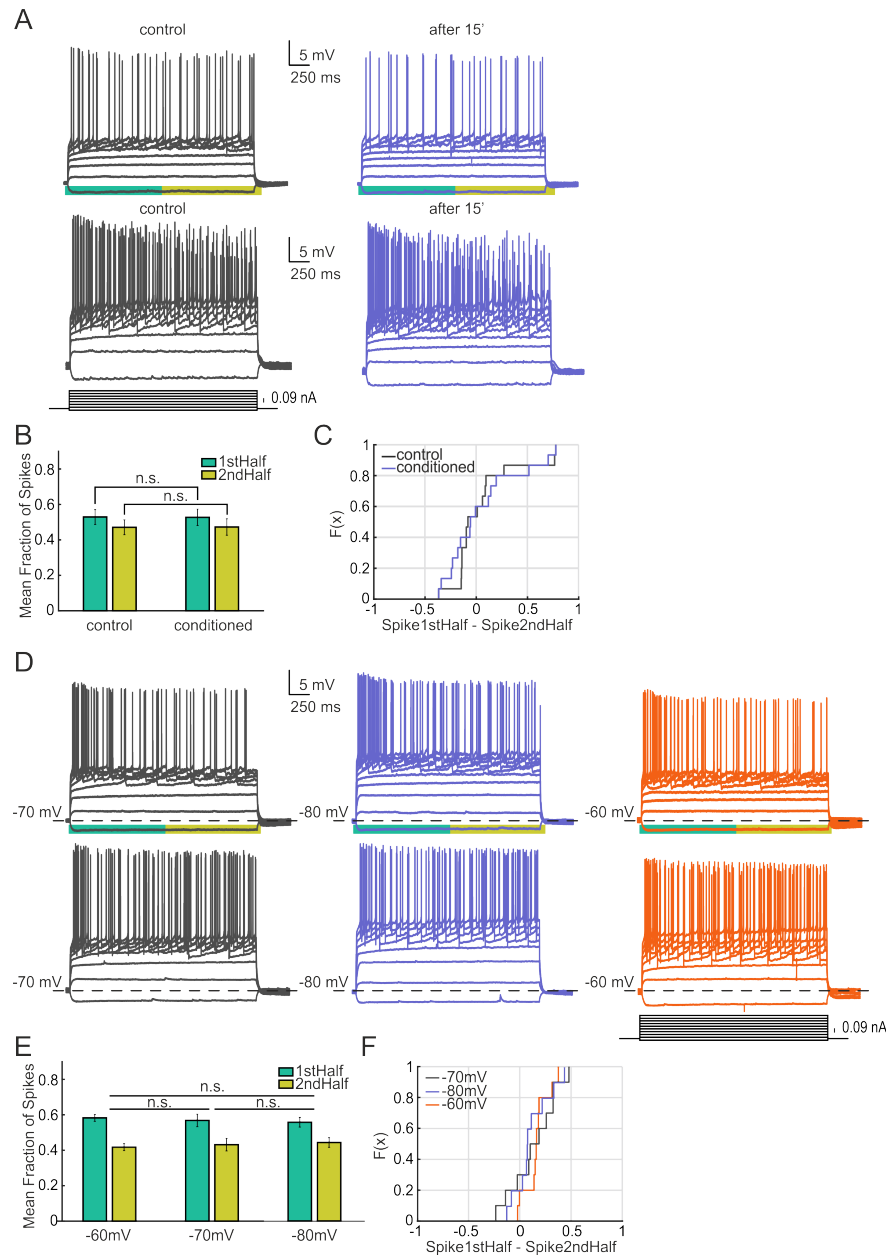

**Figure 2. CA3 firing patterns are stable over time as well as to changes in resting membrane potential.** Firing pattern transitions are not elicited by step current injection alone. A) Examples of two cells whose firing pattern have been measured by step-wise current injection (protocol showed in the inset). The cells do not show changes in firing pattern after 15 min of recording. B) Mean fraction of spikes for the population in the first and second half of the voltage trace for both control and conditioned cases. No significant redistribution on the fraction of spikes is observed ( $n = 15$ ,  $p=0.583$ , two-sided Wilcoxon signed rank test). C) Empirical cumulative distribution Function for the data shown in B. Every individual case is represented as the number of spikes for the first half of the trace minus the spikes for the second half. D) Firing pattern transitions are not elicited by sustained shifts in membrane potential. Examples of two cells that have been hold at different membrane potentials through steady current injection (-70, -80 and -60 approximately). After changing the holding potential of the recorded neuron the firing pattern was measured by step-wise current injection (protocol showed in the inset). No transitions of firing pattern were observed at any of the different holding potentials. E) Mean fraction of spikes for the population in the first and second half of the voltage trace for every condition. No significant redistribution on the fraction of spikes is observed ( $V_m$  60 vs 70,  $p=0.652$ ;  $V_m$  60 vs 80,  $p=0.084$ ;  $V_m$  70 vs 80,  $p=0.695$ ) ( $n = 10$ , two-sided Wilcoxon signed rank test)). F) Empirical cumulative distribution function for the data shown in E. Every individual case is represented as the number of spikes for the first half of the trace minus the spikes for the second half.



272 recording time (see Figures 2D and F). In addition, a change in the fraction of spikes in favor of the first half was also  
273 found after conditioning in a setting where dialysis was minimized (high resistance pipette recordings, 10-12 M $\Omega$ ,  
274  $n=10$ ,  $p=0.048$ , two-sided Wilcoxon signed rank test).

275 We noted however a significant change in the mean fraction of spikes (in favor of the first half) after 20 min of  
276 recording, when assessing the firing pattern three times during this period ( $n = 12$ ,  $p=0.005$ , two-sided Wilcoxon  
277 signed rank test). This indicates that transient suprathreshold current steps can also trigger changes in firing, as  
278 previous studies in CA3 have reported (Brown and Randall, 2009), although continuous subthreshold conditioning  
279 over a shorter time scale has a stronger effect ( 8 minutes, Figure 1).

### 280 **Firing pattern transitions are gradual during the course of the conditioning and long-lasting**

281 We next assessed whether the expression of the firing transition was gradual or whether firings changed more sharply  
282 during the course of the conditioning. To this end, we repeated the original experiment (Figure 1) while assessing the  
283 firing pattern of the cells every 100 trials of conditioning. The general observation was that cells displayed a gradual  
284 transition in firing, in which more regular or accelerating patterns changed towards different degrees of adaptation  
285 and intrinsic burst responses. For example, the cell shown in Figure 3A presents a non-adapting or regular pattern in  
286 control conditions. After 100 repetitions of the conditioning protocol the spike distribution changes to an adapting  
287 continuous pattern. This adaptation gets reinforced after 200 conditionings, with the cell later adopting an intrinsic  
288 burst pattern. Other cells showed a progression for more regular to only adapting patterns. As an average, the smooth  
289 transition is reflected in the mean fraction of spikes shown in Figures 3B and C. As it can be observed, successive  
290 conditionings translate into a stronger redistribution of this fraction in favor of the first half of the trace, a reflection of  
291 the cells adopting a stronger adapting or intrinsic burst responses. The progression of the resting membrane potential  
292 ( $V_m$ ) and input resistance ( $R_{in}$ ) during the course of the conditioning was also monitored, and it is shown in Figure  
293 3D. A progressive increase in  $V_m$  and a progressive decrease in  $R_{in}$  is observed ( $R_{in}$ , from  $166.4 \pm 54.2\text{M}\Omega$  to  $115.3 \pm$   
294  $53.3\text{M}\Omega$ , two-sided Wilcoxon signed rank test,  $p=0.031$ ,  $n=7$ ) ( $V_m$ , from  $-64.6 \pm 6.2\text{mV}$  to  $-58.7 \pm 5.7\text{mV}$ , two-sided  
295 Wilcoxon signed rank test,  $p=0.047$ ,  $n = 7$ ).

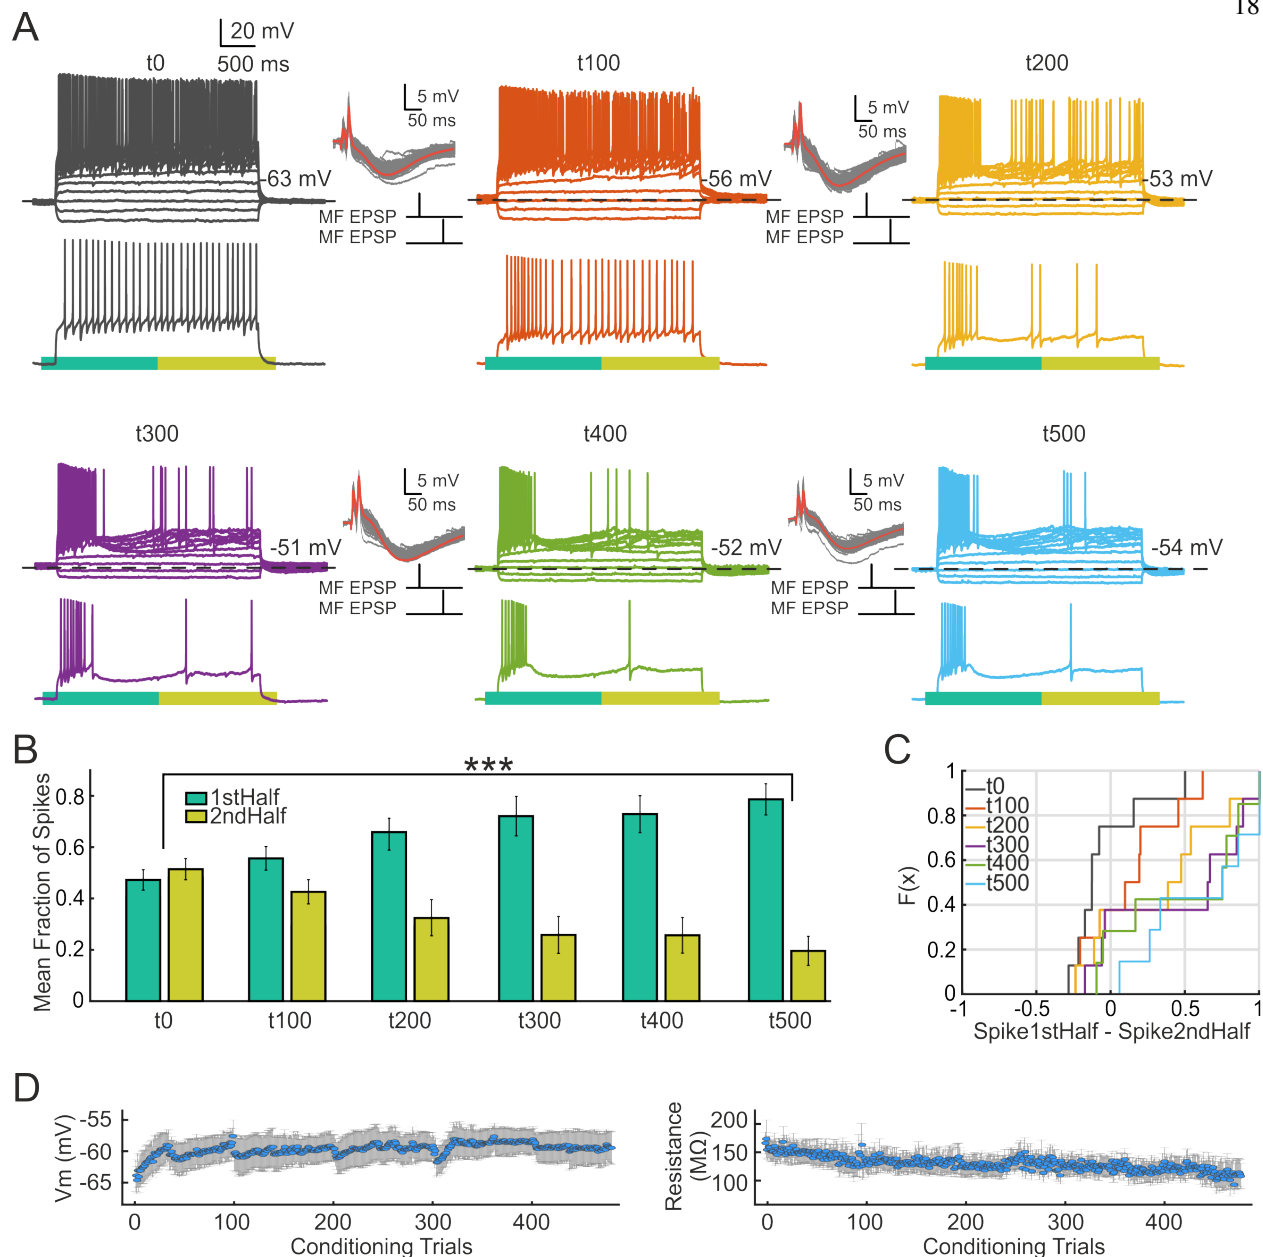

**Figure 3. The expression of the conditioning effect is gradual over the course of the stimulation.** Firing patterns were assessed every 100 conditionings until 500 trials were completed. A) Representative cell whose firing pattern is non-adapting in control conditions (grey). After 100 stimulations the cell shows an adapting pattern (red), after 200 the adaptation gets stronger and an intrinsic burst pattern emerges after the successive conditionings (orange to blue). Conditioning protocols are shown on the insets. Red line shows the median. B) Mean fraction of spikes for the population in the first and second half of the voltage trace during the successive conditionings. A significant redistribution of the fraction of spikes is observed during the course of the conditioning. The fraction of spikes on the first half continuously increases in favor of the second half ( $n = 8$ ,  $p = 1.24 \times 10^{-5}$ , repeated measures ANOVA) C) Empirical cumulative distribution function for the data shown in B. The number of spikes for the first half of the trace minus the spikes for the second half is shown for every cell ( $n = 8$ ) D) Average resting membrane potential (V<sub>m</sub>) and input resistance (R<sub>in</sub>) of the cells during the course of the conditioning. V<sub>m</sub> was measured as the baseline voltage before the depolarization caused by the conditioning. R<sub>in</sub> was measured by injecting a negative current step after each conditioning trial. Circles indicate mean, bars indicate SEM ( $n = 8$ ). In the cases where V<sub>m</sub> was above -60 mV a small holding current was injected to keep the cell stable during the conditioning.

296 Changes in intrinsic properties of neurons have been previously reported to be long-lasting, similar to synaptic forms  
297 of long-term plasticity (Turrigiano and Nelson, 2004; Titley et al., 2017). We thus assessed whether the firing pattern  
298 plasticity was stable in time or whether the changes were transient. We conditioned the cells and followed their firing  
299 response up to 30 minutes after conditioning. In all cases, cells presented a post-conditioned characteristic change in  
300 firing pattern towards adapting and intrinsic burst patterns (as in Figure 1). This same pattern was assessed every 10  
301 minutes and showed to be persisting up to the whole recording period (see Figure 4), indicating a long-lasting change  
302 in intrinsic excitability. In a couple of cells the pattern persisted up to 50 min of recording. A representative cell is  
303 shown in Figure 4A, which presented an accelerating pattern that switched to intrinsic burst after conditioning. This  
304 induced pattern remained stable for 30 min. At the population level, the stability can be reflected in the mean fraction  
305 of spikes 4 C. After the conditioning effect, no significant change in this fraction was observed over 30 min (see Figure  
306 4C). Note that for this subset of cells a 60 ms paired pulse was employed during the conditioning (see Figure 4A). The  
307 previous observed changes in firing occurred upon conditioning with a paired mossy fiber current pulse separated by  
308 20 ms and given at a frequency of 1 Hz (Figure 1). We wondered whether a different timing interval (60 ms) would  
309 affect the outcome of the conditioning, as shown by previous reports of subthreshold synaptic plasticity in the CA3  
310 circuit (Brandalise and Gerber, 2014; Brandalise et al., 2016). However, no differential effect on the pattern was found  
311 (Figure 4), indicating that the mechanism of intrinsic firing plasticity is not sensitive to these two different time scales.

### 312 **Firing pattern transitions are independent of synaptic input and are blocked by protein kinase A and C inhibitors**

313 We attempted to resolve whether synaptic input was necessary to elicit the changes, or whether they could be induced  
314 by direct stimulation of the soma. To this end, we used intra-somatic injection of paired step current pulses whose  
315 parameters were chosen to elicit a similar somatic voltage response compared to that generated by the mossy fiber  
316 stimulation (Figure 5). This direct subthreshold somatic stimulus evoked changes in discharge pattern that were  
317 similar to those elicited by the indirect mossy stimulation. For example, the cell in Figure 5A displayed a delay  
318 accelerating firing pattern in control conditions and underwent a transition towards intrinsic burst pattern after somatic  
319 conditioning. The population data for direct stimulation showed a significant redistribution in the fraction of spikes  
320 in favor of the first half of the trace versus the second half after the conditioning (Figures 5B and C) (n=12). In these

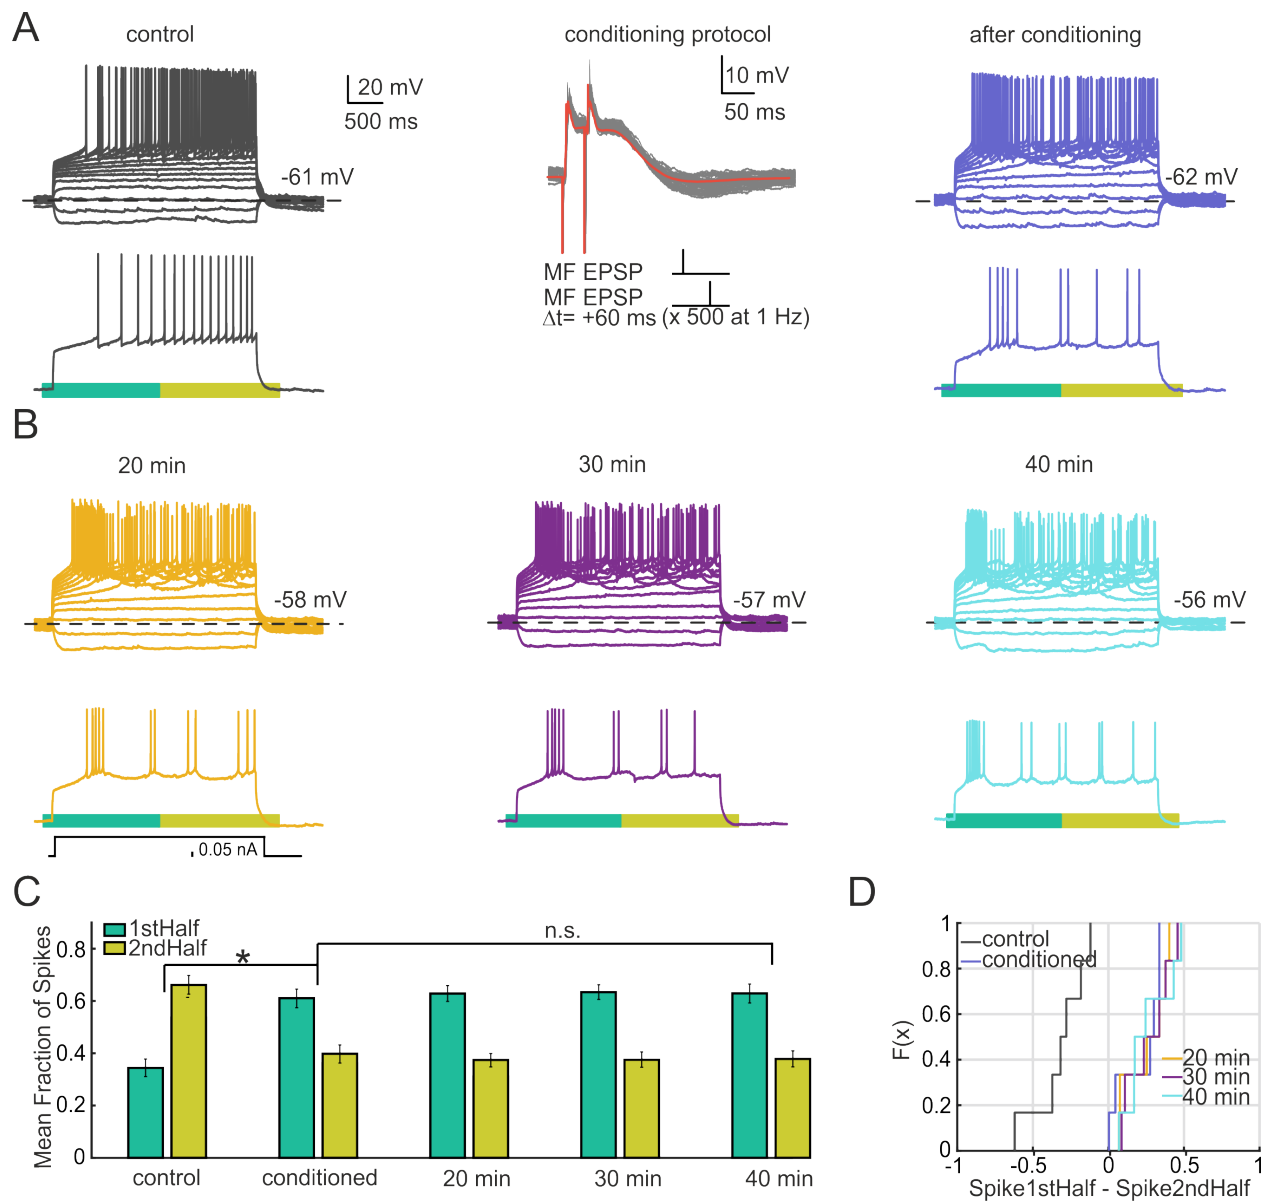

**Figure 4. The effect of the conditioning is persistent over time.** Cells were followed for 40 minutes to assess whether the firing pattern plasticity was long-term. A) Example cell with an accelerating firing pattern in control conditions (grey). The cell was conditioned subthresholdly with a double mossy fiber current pulse separated by 60 ms and given at a frequency of 1 Hz (protocol is shown in the middle, red line indicates the median). A change in pattern to intrinsic burst is elicited (blue). B) The same cell was followed every 10 min after conditioning until reaching 40 min of recording (orange, purple and blue). The pattern remained stable. C) Mean fraction of spikes for the population in the first and second half of the voltage trace before, after conditioning and every 10 min thereafter. A significant redistribution on the fraction of spikes is observed after the conditioning ( $n=6$ ,  $p=0.031$ , two-sided Wilcoxon signed rank test). No significant change in this fraction was observed over 30 min after conditioning ( $n=6$ ,  $p=0.4$ , repeated measures ANOVA). D) Empirical cumulative distribution function for the data shown in C.

321 experiments we observed the same tendency of neurons to become adapting and intrinsic burst after conditioning as  
322 for mossy fiber stimulation. This result suggests that the mechanism underlying the changes in firing pattern is not  
323 localized to synapses, but rather acts at a more central, probably somatic or proximal dendritic level.

324 The fact that the firing pattern transitions could be reproduced by this direct depolarization of the soma raised the  
325 question of whether the somatic depolarization elicited by mossy fiber activation is necessary to elicit the observed  
326 changes in firing. We thus repeated the mossy conditioning experiment (Figure 1) while artificially hyperpolarizing  
327 the neuron (see Figure 6). The hyperpolarization did not abolish the effect of the conditioning, since a significant  
328 redistribution of spikes in favor of the first half of the trace was observed after the conditioning (see Figure 6B and C).  
329 However, the effect was stronger when conditioning the cells without hyperpolarization (see Figure 6B or Figure 1D for  
330 comparison). An example cell is shown in Figure 6A. The cell presents an accelerating pattern in control conditions.  
331 After conditioning via the mossy fiber pathway, under the presence of an hyperpolarizing pulse, the cell changed  
332 its firing towards a non-adapting burst pattern. When re-conditioning the cell with no hyperpolarization the pattern  
333 switched to intrinsic burst. These results suggest that a transient depolarization, such as the intrasomatically injected  
334 stimulus, is sufficient but not necessary to elicit the effect. The residual effect may indicate that the mechanism is  
335 localized near the MF synapse, in which case somatic hyperpolarization could be insufficient to prevent depolarization  
336 there. Note however that in most neurons a handful of depolarizing trials were accidentally elicited while adjusting  
337 the magnitude of the current MF pulse. Additionally, some cells presented occasional rebound spiking caused by the  
338 hyperpolarization, while an increase in stimulation amplitude due to the increase in driving force was also frequent.  
339 This could all potentially contribute to the observed effect.

340 Next, we sought to identify what internal mechanism could be responsible for the firing pattern transitions. The firing  
341 pattern of the cell depends on the distribution of ion channels, or conductances, that the cell presents at its membrane  
342 (Hille, 2001). A possible mechanism would act by changing this distribution. Due to the time scale of the response  
343 (on the order of minutes) we ruled out protein synthesis of new channels on the membrane. An alternative could  
344 be channel phosphorylation, a mechanism known to affect the maximal conductance of the channel on a relatively  
345 short timescale (Davis et al., 2001). We reproduced the conditioning protocol in the presence of the PKA and PKC

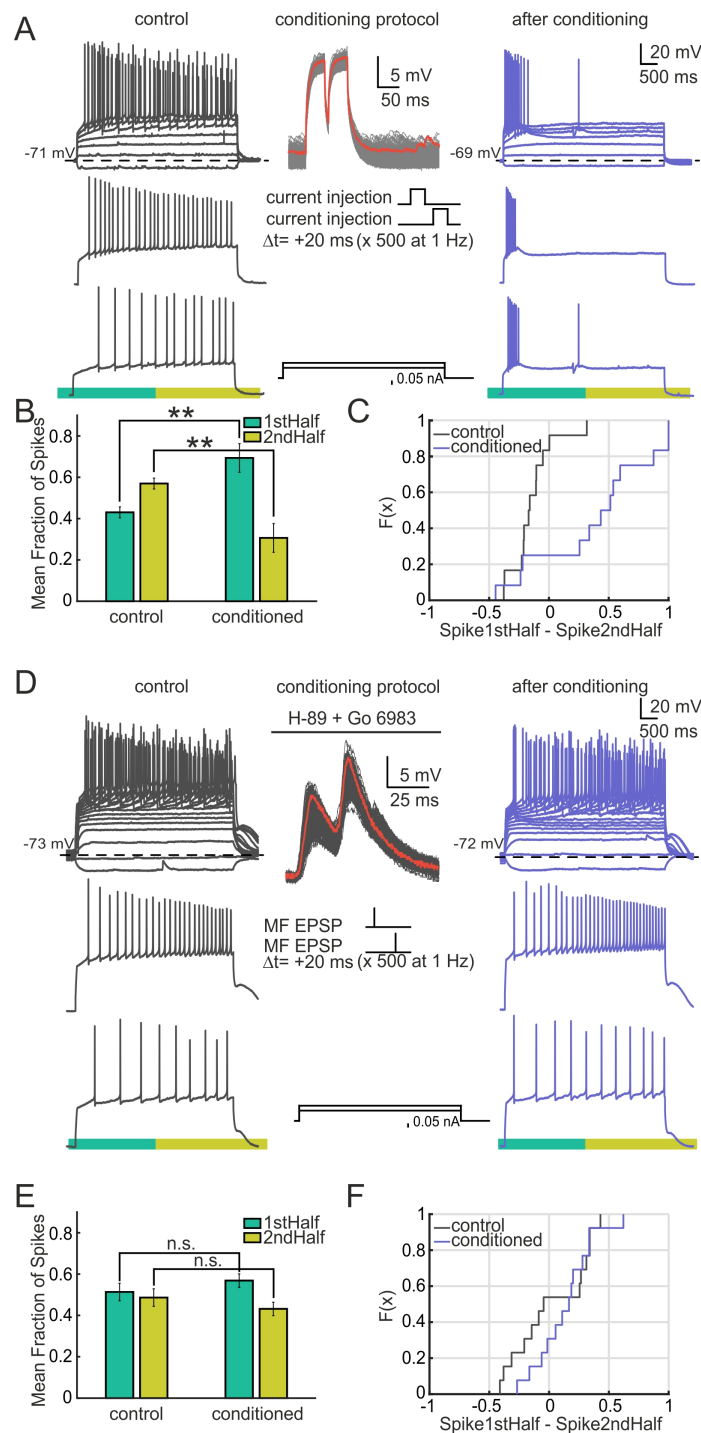

**Figure 5. CA3 firing pattern transitions occur upon somatic conditioning and are blocked by kinase inhibitors.** A) Example of an intrasomatic conditioned cell that switched from delay accelerating (grey traces) to intrinsic burst firing (blue traces). The conditioning protocol is shown in the middle column. The red line shows the median. EPSPs were evoked by injection of paired current steps, of 50 ms in duration and separated by 20 ms. The double steps were repeated 500 times at 1 Hz. The series of repeated pulses are shown superimposed. A sample trace is shown in red. B) Mean fraction of spikes for the population in the first and second half of the voltage trace for both control and conditioned cases. A significant redistribution on the fraction of spikes occurs after the conditioning. The fraction of spikes on the first half is increased while it decreases in the second half ( $n=12$ ,  $p=0.0024$ , two-sided Wilcoxon signed rank test). C) Empirical cumulative distribution Function for the data shown in B. Every individual cell is represented as the number of spikes for the first half of the trace minus the spikes for the second half ( $n=12$ ). D) Example of a mossy fiber conditioned cell (as described in Figure 1) under the presence of H-89 and Go 6983 (PKA and PKC inhibitors) on the intracellular pipette. The cell expresses a delay accelerating pattern in control conditions and remains under such pattern after the conditioning protocol is applied. E) Mean fraction of spikes for the population in the first and second half of the voltage trace for both control and conditioned cases. The redistribution of the fraction of spikes was not significant after the conditioning ( $n=13$ ,  $p=0.266$ , two-sided Wilcoxon signed rank test). F) Empirical cumulative distribution function for the data shown in D. Every individual cell is represented as the number of spikes for the first half of the trace minus the spikes for the second half ( $n=13$ ).

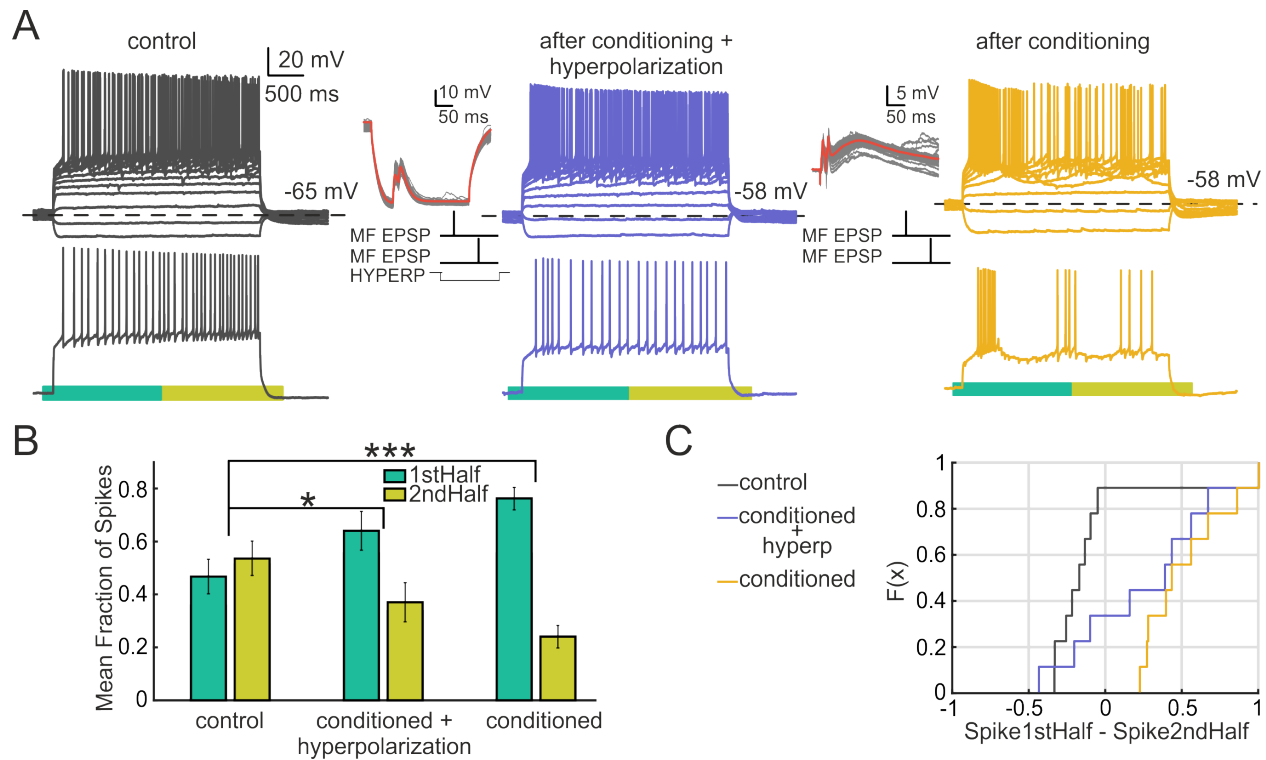

**Figure 6. The effect of mossy fiber conditioning does not require somatic depolarization.** Conditioning was performed while hyperpolarizing the cell with a negative current pulse. A) Cell that presents an accelerating pattern in control conditions (grey). Conditioning (MF double pulse, delta 20 ms given at 1 Hz) was elicited under the presence of an hyperpolarizing current step (protocol is shown in the inset, red line indicates the median). The cell changes its firing pattern to a non-adapting burst response. Thereafter, the cell is reconditioned via only the mossy fiber double pulse. After this conditioning the cell presents an intrinsic burst pattern. B) Mean fraction of spikes for the population in the first and second half of the voltage trace during the successive conditionings. A significant redistribution on the fraction of spikes is observed after the conditioning under the hyperpolarizing pulse ( $n=9$ ,  $p=0.016$ , two-sided Wilcoxon signed rank test). After a second conditioning, without hyperpolarization, a stronger effect is found ( $n=9$ ,  $p=0.008$ , two-sided Wilcoxon signed rank test). C) Empirical cumulative distribution Function for the data shown in B. The number of spikes for the first half of the trace minus the spikes for the second half is shown for every cell ( $n=9$ ).

346 inhibitors H-89 and Go 6983 in the intracellular recording pipette. Figure 5D shows a cell whose firing pattern in  
347 control conditions was delay accelerating. After mossy fiber conditioning in the presence of the inhibitors the cell  
348 retained this initial pattern. 84% of cells recorded with phosphorylation inhibitors showed no visible modulation of  
349 the Petilla label pattern (11 out of the 13 cells). Figures 5E and F show the population response for these cells. Unlike  
350 Figure 1D, no significant redistribution of the spikes was found on the presence of the inhibitors (n=13). These results  
351 suggest that phosphorylation is implicated in the mechanism of firing pattern transition.

### 352 **Using Dynamic Time Warping (DTW) and a conductance based model to infer firing transitions and parameter** 353 **changes after plasticity**

354 We observed that the conditioning induced firing pattern changes from more regular patterns towards early bursting  
355 and adapting patterns. We sought to quantify these changes using hierarchical clustering methods (Druckmann et al.,  
356 2013; Tricoire et al., 2011; Hosp et al., 2014) to establish more objectively which discharge type to associate with  
357 every response, and to quantify the frequencies of transitions between them. For our clustering method, we obtained  
358 instantaneous firing rate vectors of the experimental voltage traces and estimated pairwise distances using the DTW  
359 algorithm. DTW operates then directly on the action potential temporal sequence rather than relying on a pre-defined  
360 set of features. Furthermore, several features commonly used in previous parametric clustering methods (Druckmann  
361 et al., 2013; Tricoire et al., 2011; Hosp et al., 2014) are unaffected by the conditioning. For example, AP amplitude,  
362 width and afterhyperpolarization (AHP) showed no difference before and after the stimulation (AP amplitude:  $78.63 \pm$   
363  $14.95\text{mV}$ ,  $75.60 \pm 9.77\text{mV}$ , paired t-test,  $p=0.11$ , AP half width:  $1.11 \pm 0.26\text{ms}$ ,  $1.10 \pm 0.24\text{ms}$ , paired t-test,  $p=0.74$ ,  
364 AHP:  $13.62 \pm 3.76\text{mV}$ ,  $12.66 \pm 4.15\text{mV}$ , paired t-test,  $p=0.12$ ,  $n = 50$ ). The rate vectors used for the clustering can be  
365 interpreted as the subthreshold voltage envelope in which the discharge response of each cell rides, and this envelope  
366 is the essence to catalogue similar firing patterns. Once the distances between the vectors were calculated, Wards  
367 linkage was applied in order to obtain a hierarchical tree to reveal the classes.

368 The results of the cluster analysis of discharge patterns are shown in Figure 7A. We set the threshold of the clustering  
369 tree at a level that separates the traces into 5 distinct families. The threshold was chosen large enough to yield sufficient



370 structure to interpret the hierarchy in terms of recognized response types (Ascoli et al., 2008). Representative traces  
371 of each family are shown in Figure 7B. The average of the firing rate vectors of every cluster is depicted beneath each  
372 representative trace.

373 The clustering algorithm successfully captures the typical time courses of the firing patterns. The right branch of  
374 the cluster tree contains accelerating and non-adapting firing patterns, while the other contains adapting and intrinsic  
375 bursting patterns together with a smaller group of traces that have delayed spiking profiles. The consistency of the  
376 algorithm was confirmed by its successful clustering of independent feature vectors derived from the same set of  
377 current injections (same cell under the same conditions) into a single cluster. Indeed, in 86% of cases (43 of the 50  
378 cells) the algorithm successfully allocated the majority of vectors from the same set of current injections into single  
379 clusters. Vectors from the 7 remaining cells were not consistently classified. For 50% of the cells all of their voltage  
380 traces fell into the same cluster, and for 90% of the cells at least 50% did. The allocation of some responses from the  
381 same cell into more than a single cluster does however follow a biological logic. For example, for cells classified as  
382 accelerating, some of their voltage traces could reasonably fall into the non-adapting cluster because acceleration may  
383 vanish at high current injections. A similar reasonable misclassification is possible for adapting traces. In this case  
384 low current injections may be classified as non-adapting because the currents are not high enough to elicit adaptation.  
385 In particular, many of the traces belonging to the delayed spiking cluster are derived from cells whose traces at low  
386 current injections were assigned to the accelerating cluster, or belonged to non-adapting cells with spiking delay. The  
387 transitions between cluster types induced by the stimulation protocol are shown in Figure 7D. This figure considers  
388 only those cells in which responses both before and after conditioning could be clearly assigned to a cluster. In total,  
389 68% of the cells ( $n = 50$ ) changed their original cluster as a result of subthreshold conditioning. This quantitative  
390 result supports the observation that cells tend to transition towards more adapting and intrinsic burst profiles. 70% of  
391 cells initially belonging to the non-adapting cluster exhibited such changes in response (14 cells), with 35% moving  
392 into the intrinsic burst category, and 35% exhibiting adapting spike patterns. 5 of the 6 cells from the adapting cluster  
393 (83%) switched to the intrinsic burst type. Most of the cells for which the firing pattern did not change were already  
394 in the most common target states of transitions. For example, 89% of the intrinsic bursting cells did not change

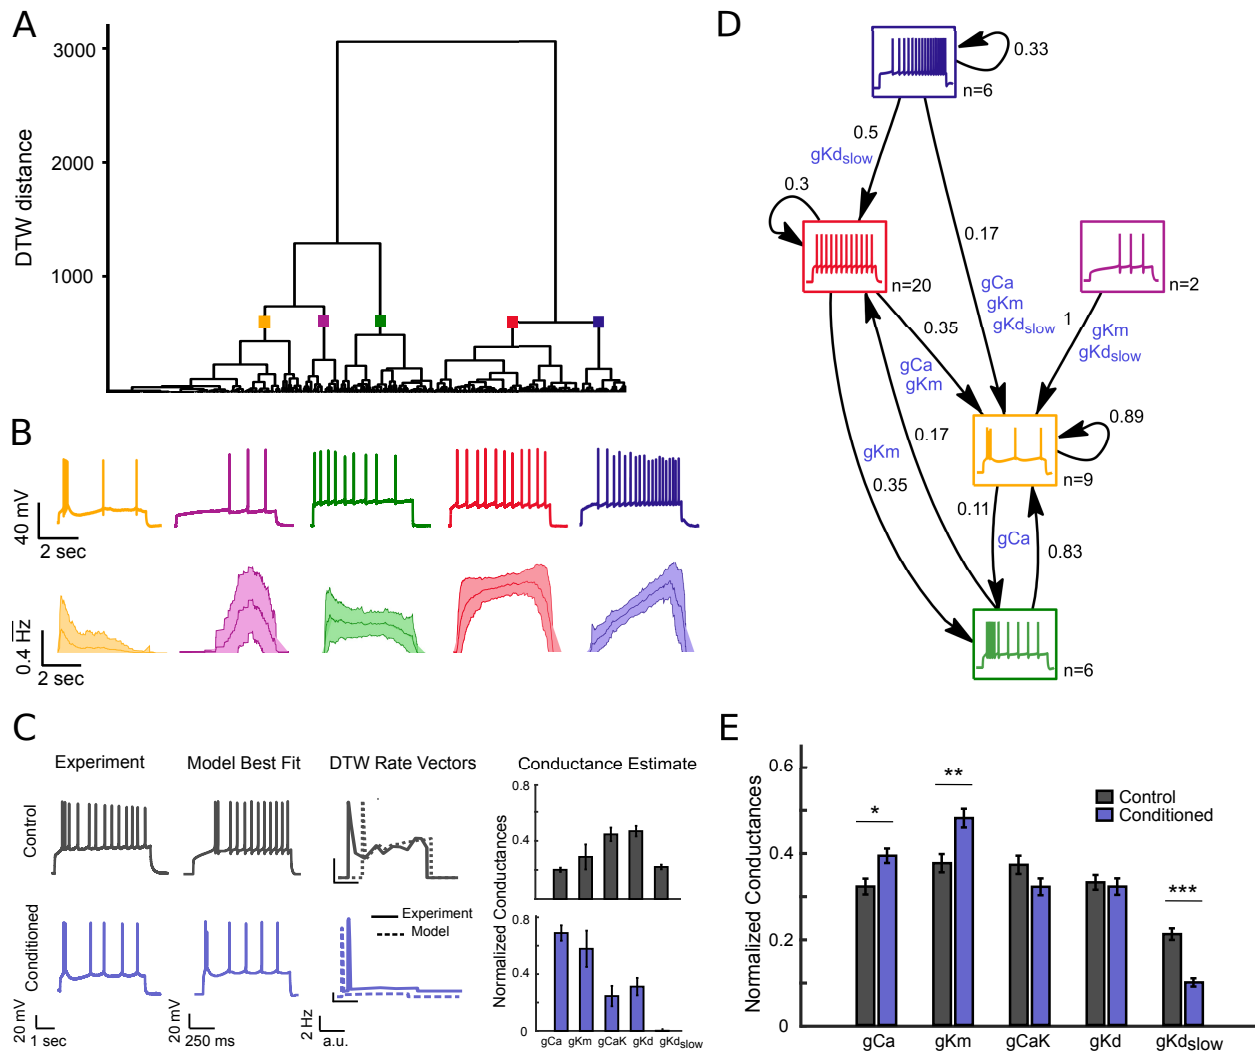

**Figure 7. Hierarchical clustering of experimental discharge traces and mapping to a conductance model.** A) Dendrogram of clustered traces. The data included in the cluster corresponds to the mossy fiber conditioned cells of Figure 1. Two main families can be identified: one containing adapting and bursting traces, together with delayed spiking patterns (left branch); and another branch containing regular and accelerating traces (right branch) ( $n=50$ ). B) Representative traces from each cluster. Below, average instantaneous firing rate over all traces belonging to the same cluster. Middle lines indicate the mean; light outer lines indicate standard deviations. The instantaneous firing rate (in Hz) is normalized to 1. C) Every experimental trace is matched to a model database of traces. Using the DTW distance on the instantaneous firing rate vectors the best matches are selected (best match is depicted). A conductance estimate for the experimental trace is obtained (average of 10 best matches are shown). D) Transitions observed between firing patterns before and after conditioning. Each cell is assigned to a single cluster (represented as a box) for both the control and conditioned cases. Arrows indicate transitions between types whenever a cell changed cluster. Self-loops indicate that the firing pattern was retained after conditioning. Numbers indicate percentages of observed transitions. The number of cells in each category under control conditions is displayed next to each pattern type. Cells tend to transition towards adapting and bursting patterns following conditioning ( $n = 43$ ). Seven cells were assigned as unclassified. A conductance road map showing the key conductances responsible for a transition in firing pattern are represented on the edges. The main channels implicated are *gCa*, *gKd<sub>slow</sub>* and *gKm*. E) Average conductance composition for matched experimental cells in control (grey) and conditioned cases (blue). There is a significant increase in *gKm*, *gCa* and a decrease in *gKd<sub>slow</sub>* (*gCa*  $p=0.015$ , *gKm*  $p=0.0084$ , *gCaK*  $p=0.2203$ , *gKd*  $p=0.2501$ , *gKd<sub>slow</sub>*  $p=2.01e^{-8}$ , two-sided Wilcoxon signed rank test,  $n = 485$ ).

395 cluster. This provides further evidence for a predominantly unidirectional change of firing patterns in response to  
396 conditioning. The 7 cells that could not be consistently classified under control conditions were all correctly classified  
397 after the stimulation. They showed the same transition tendencies: 5 moved into the intrinsic bursting cluster, the other  
398 2 became adapting.

399 We next aimed to infer which underlying parameters could be responsible for the systematic transitions. Our results  
400 showing that phosphorylation inhibition blocks the conditioning effect support the hypothesis that the prime candidate  
401 for this plasticity is a change in the profile of active conductances. We explored this possibility using simulations of  
402 action potential discharge in a conductance-based single compartment neuron model containing 10 voltage and calcium  
403 gated ion channels (see Methods). The densities and kinetics of these channels were derived from experimental  
404 measurements of CA3 pyramidal neurons (Hemond et al., 2008).

405 A database of representative ranges of maximal conductances that could plausibly explain the discharge patterns  
406 observed experimentally was generated using the single compartment model. To do this, the maximal conductances of  
407 the different channels were swept through ranges that would likely encompass the experimentally observed patterns.  
408 The spiking conductances were left constant, whereas we varied the conductances with longer time constant, which are  
409 responsible of the discharge dynamics:  $gCa$ ,  $gCaK$ ,  $gKm$ ,  $gKd$  and  $gKd_{slow}$  (see Table 1 for the exact ranges). In this  
410 way a total of 100'000 conductance profiles were generated. We obtained the discharge response to different levels of  
411 current injection for each conductance profile, giving a total of 800'000 voltage traces with their associated maximal  
412 conductance profiles. Every single experimental trace (coming from both, control and conditioned cases) was matched  
413 against the collection of traces in the model database using the DTW algorithm on the instantaneous firing rate vectors  
414 (see Figure 7C for an example). The best fits were then selected, allowing us to obtain an estimate of the maximal  
415 conductance profile likely to be present in the experimental neuron (Figure 7C). The key to infer the parameters is thus  
416 to recognize, via the DTW algorithm on the rate vectors, the subthreshold voltage envelope generated by the long-time  
417 constant conductances, and not the precise spike times.

418 The diagram of Figure 7D represents the crucial conductances determining the transitions between discharge patterns

419 in firing pattern space. These are  $gKm$ ,  $gCa$  and  $gKd_{slow}$ . For example, to move to the intrinsic burst cluster (yellow) a  
420 characteristic enrichment in  $gKm$  and  $gCa$  is needed, which allows for the generation of the burst (given the presence  
421 of basal levels of  $gCaK$ ) and the spacing of further spikes. For the accelerating and delayed patterns (blue and purple),  
422 the presence of  $gKd$  is important for a delayed onset of the spiking, and the slow inactivation of  $gKd_{slow}$  is necessary  
423 for generating the continuous acceleration of the spike rate. In the case of the adapting patterns (green), the inclusion  
424 of  $gKm$  is necessary for the slowing down of the action potentials after the initial discharge.

425 Figure 7C shows the average conductance content of the matched experimental traces in control and conditioned cases.  
426 The shift towards adapting and intrinsic bursting behaviors after the conditioning corresponds to a significant increase  
427 in  $gKm$  and  $gCa$ , and a decrease in  $gKd_{slow}$  ( $gCa$   $p=0.015$ ,  $gKm$   $p=0.0084$ ,  $gCaK$   $p=0.2203$ ,  $gKd$   $p=0.2501$ ,  $gKd_{slow}$   
428  $p=2.01e^{-8}$ , two-sided Wilcoxon signed rank test,  $n=485$ ). This correspondence of firing patterns and biophysical  
429 parameters offers an interpretation of the causes of transitions between firing behaviours induced by the conditioning.

#### 430 **Inhibition of Kv7 and calcium channels abolishes the effect of firing pattern plasticity**

431 Having unraveled via the modeling study that the changes in firing pattern could correspond to an increase in  $gKm$  and  
432  $gCa$  conductances, we decided to test this prediction via pharmacological blocking of the corresponding channels. We  
433 thus repeated the original experiment (Figure 1) and administrated the blockers  $NiCl_2$  and  $XE991$  via the perfusion  
434 system after the conditioning.  $NiCl_2$  is known to block T,N and L type calcium channels, with a stronger effect on the  
435 T channel (Kochegarov, 2003), and  $XE991$  is a selective blocker of the muscarinic potassium channel  $Kv7/KCNQ$   
436 (Brown and Randall, 2009). The results of this experiment are shown in Figure 8. Administration of the drugs blocked  
437 the effect of the conditioning, with the cells losing the change in pattern 20 min after perfusion (note that the drug took  
438 3-4 min to reach the bath and start diffusing). For example, Figure 8A shows a cell that switched from accelerating to  
439 intrinsic burst after conditioning. Drugs were administrated immediately after checking the conditioning effect and the  
440 cell was followed for 30 min since that point (Figure 8C). 20 minutes after starting of drug perfusion the cell presented  
441 an adapting burst pattern, which became adapting continuous after 30 min. The population data shows a significant  
442 redistribution of spikes following drug perfusion, which goes in the opposite direction of that caused by the effect (see

443 Figures 8E and F). Note that in the absence of the drugs, we have demonstrated that the plasticity is long-lasting over  
444 the course of these 30 min (Figure 4). Below each trace (Figures 8B and D), the model estimate of its conductance  
445 distribution is shown, as explained in Figure 7C. An increase in  $gCa$  and  $gKm$  conductances is observed after the  
446 conditioning, which then decrease after application of their corresponding channel blockers.

447 We noted that a residual adaptation remained in some neurons after the drug administration. This could likely be  
448 due to the low concentration of XE991 employed ( $10 \mu\text{M}$ ), although it could also be due to the small acceleration  
449 at the beginning of the trace given by the delay present in these neurons. We decided to identify whether  $gKd$  was  
450 responsible for such delay as hinted by the model (Figure 8D). D-type currents, caused by Kv1 channels, can be  
451 blocked by low concentrations of 4-aminopyridine (4-AP). We thus repeated the experiment using 4-AP and  $NiCl_2$  as  
452 conductance blockers (see Figure 9). After successful conditioning of the cells (see Figure 9A for an example), the  
453 drugs were administered via the perfusion system. As in the previous experiment, the burst response presented by the  
454 neuron, likely caused by calcium channels, was abolished. 15 min after perfusion the delay presented by the neuron  
455 was also removed, with the cell adopting an adapting continuous pattern. Middle panel of Figure 9B shows the effect  
456 of 4-AP in removing the delay of the population of cells. There is a significant reduction of the timing of the first spike  
457 comparing to the XE991 experiment. For this subset of cells, no effect on the fraction of spikes was found after drug  
458 perfusion (see Figure 9E and F). This is likely due to the cells keeping adaptation profiles with no delay, in comparison  
459 with the previous set of experiments. Figures 9B and D show the corresponding conductance fits obtained from the  
460 voltage traces. The perfusion of the drugs results in a reduction of  $gCa$  and  $gKd$ , but not  $gKm$  as in the previous  
461 set of experiments. The present data indicate that the effect of firing pattern plasticity is likely being mediated by a  
462 recruitment of  $gKm$  and  $gCa$  conductances, with  $gKd$  necessary for shaping the delay of the spike response observed  
463 in the majority of the traces.

#### 464 **Conditioning elicits a delay bursting response on CA3 neurons in the acute slice preparation**

465 This study was performed on organotypic cultures, derived from brain slices of newborn rats that were incubated  
466 for three weeks using the roller-tube technique (Gähwiler, 1981). Organotypic cultures have been used extensively

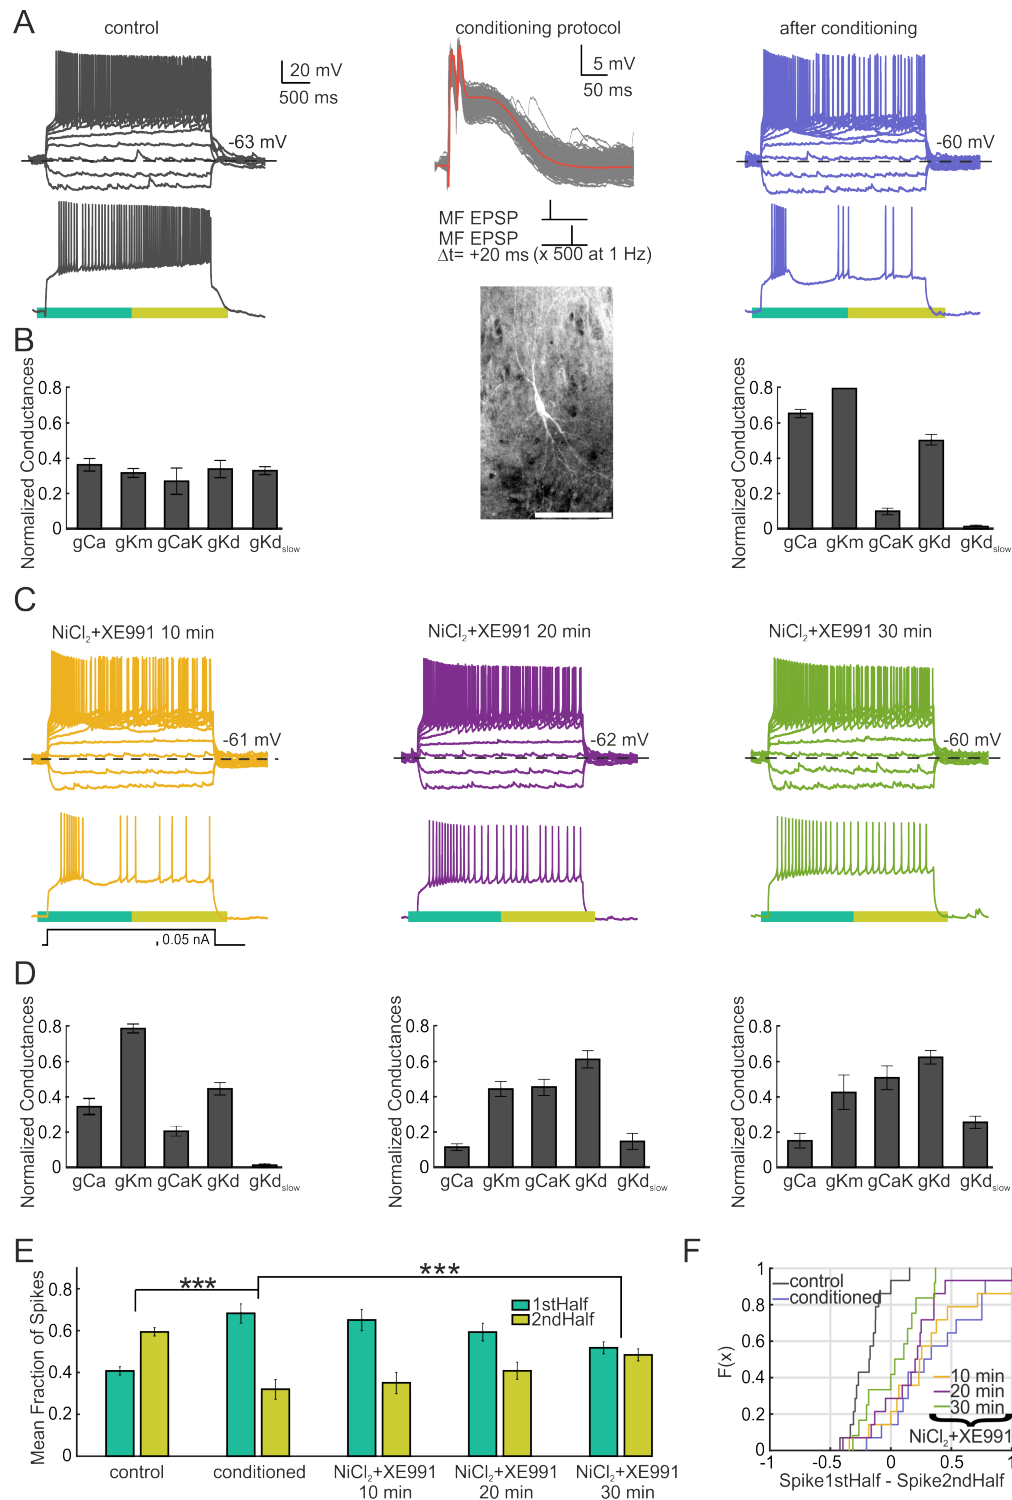

**Figure 8. Inhibition of *Kv7* and calcium channels abolish the effect of the conditioning.** A) Example of a CA3 cell with accelerating pattern (grey). After conditioning via mossy fiber stimulation (protocol shown in the inset, red line shows the median.) the cell becomes intrinsic burst (blue). A biocytin staining of the cell is depicted below the protocol (scale bar = 200  $\mu$ m). C) After the conditioning, *NiCl<sub>2</sub>* and *XE991* were administered via the perfusion system (200 and 10  $\mu$ M, respectively). The pattern was checked every 10 min since starting of perfusion. The drug took 3-4 minutes to reach the bath. 20 min since perfusion the cell presents an adapting burst pattern (purple). 10 min later the pattern can be catalogued as adapting continuous. B) and D) conductance distribution of every trace estimated via the model as done in Figure 7. Conditioning and consequent drug application affect the distribution of the conductance values. E) Mean fraction of spikes for the population in the first and second half of the voltage trace during the course of the experiment. A significant redistribution on the fraction of spikes towards the first half is observed after conditioning (n=14, p=0.0001, two-sided Wilcoxon signed rank test). This tendency is reverted during the drug application (n=14, p=7.2e-8, repeated measures ANOVA) F) Empirical cumulative distribution function for the data shown in E.

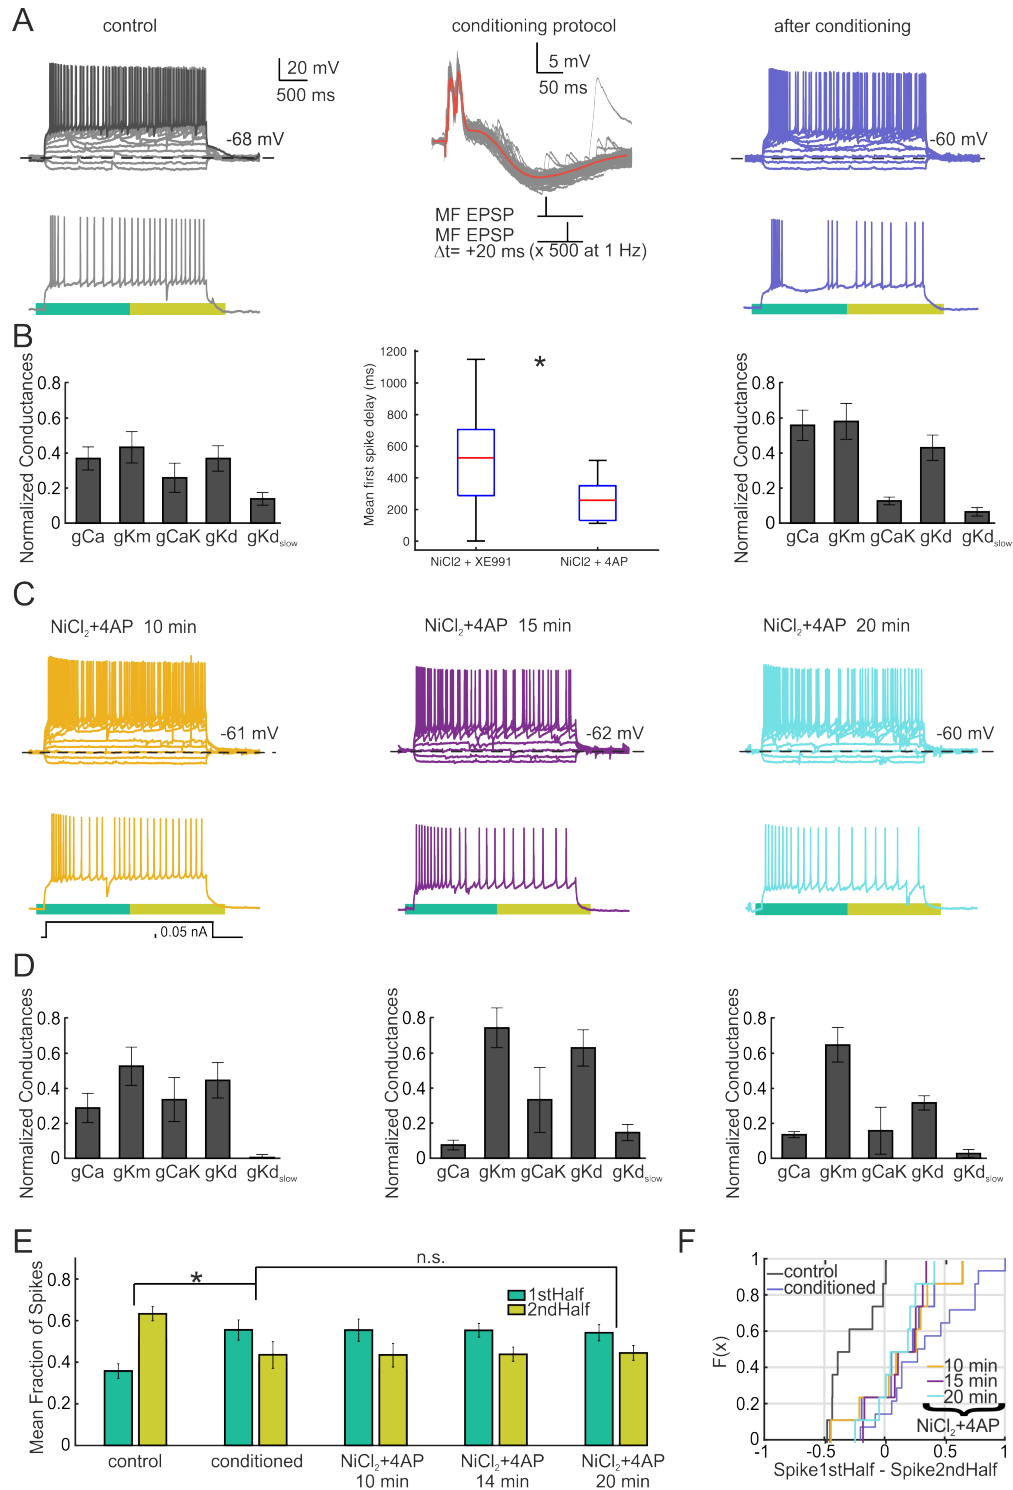

**Figure 9. Inhibition of *Kv1* and calcium channels reduces the delay of the traces but does not abolish the effect on the fraction of spikes.** A) Cell with an adapting burst firing pattern in control conditions (grey) that switches to intrinsic burst after conditioning (blue). C) After 15 min of bath application of 4-AP and *NiCl*<sub>2</sub> (at 30 and 200  $\mu$ M) the cell switches to an adapting continuous pattern, with no delay (purple and blue traces). B) and D) Conductance model fits for every voltage trace. The middle panel shows the mean delay for the first spike when 4-AP is administered with *NiCl*<sub>2</sub> via the perfusion system, in comparison with XE991. A decrease on this delay by 4-AP is observed (n=8, p=0.02, two-sided Wilcoxon signed rank test). E) Mean fraction of spikes for the population in the first and second half of the voltage trace during the experiment. A significant redistribution on the fraction of spikes in favor of the first half is observed after conditioning (n=8, p=0.015, two-sided Wilcoxon signed rank test). Application of the drugs did not have an effect on the fraction of spikes (n = 8, p=0.98, repeated measures ANOVA) C) Empirical cumulative distribution function for the data shown in E.

467 to characterize electrophysiological properties of hippocampal neurons and it is known that the tissue preserves the  
468 anatomical organization of the adult hippocampus, as well as its connectivity and characteristic spontaneous activity  
469 (Gähwiler, 1988; Okamoto et al., 2014). However, hippocampal slices are derived from immature brains, and this  
470 raises the question of whether the observed transitions of firing patterns are likely to happen in the mature tissue or  
471 whether they reflect activity-dependent acquisition of firing properties of neurons in the developing and more plastic  
472 brain. We thus decided to test whether this type of plasticity is also present on a different preparation, acute slices  
473 derived from mice between post natal day 15 and 22. Results are shown in Figure 10. Cells in the CA3 area were  
474 recorded and conditioned via the mossy fiber pathway. In general, the conditioning elicited an increase in burstiness at  
475 the end of the voltage trace, which was higher in frequency of that encountered in the organotypic case. For example,  
476 the cell in Figure 10A presented a non-adapting pattern in control conditions. After mossy fiber stimulation the cell  
477 showed a delay burst pattern. We reconditioned the cells via direct somatic current pulses, as done previously (see  
478 Figure 5). The cells also presented the same delay burst response after the re-conditioning (see Figure 10A for an  
479 example). No effect on the fraction of spikes was found in this data (Figures 10B and C), indicating that cells did  
480 not change towards adapting and initial burst responses, as in the organotypic case (Figure 1). However, the increase  
481 in delay burstiness can be observed in Figure 10D, where there is a higher representation of inter spike intervals  
482 (ISIs) below 50 ms after the conditionings. These results indicate that conditioning elicits a change in firing pattern  
483 in the acute slice preparation, although this change has a different nature to the one encountered in the organotypic  
484 preparation.

## 485 Discussion

486 The different firing patterns upon step current injection that neurons present are a feature for neuronal classification  
487 (Markram et al., 2004; Ascoli et al., 2008), and yet it is increasingly evident that ongoing activity may play a crucial  
488 role on their specification (Moody and Bosma, 2005; García et al., 2011; Dehorter et al., 2015). We shown here that  
489 CA3 neurons can switch between the main established suprathreshold discharge categories (Ascoli et al., 2008) after  
490 only a few minutes of subthreshold conditioning to their somata either by activation of their synapses, or by direct  
491 intrasomatic current injection. The effect of conditioning was long-lasting, and abolished in the presence of PKA and



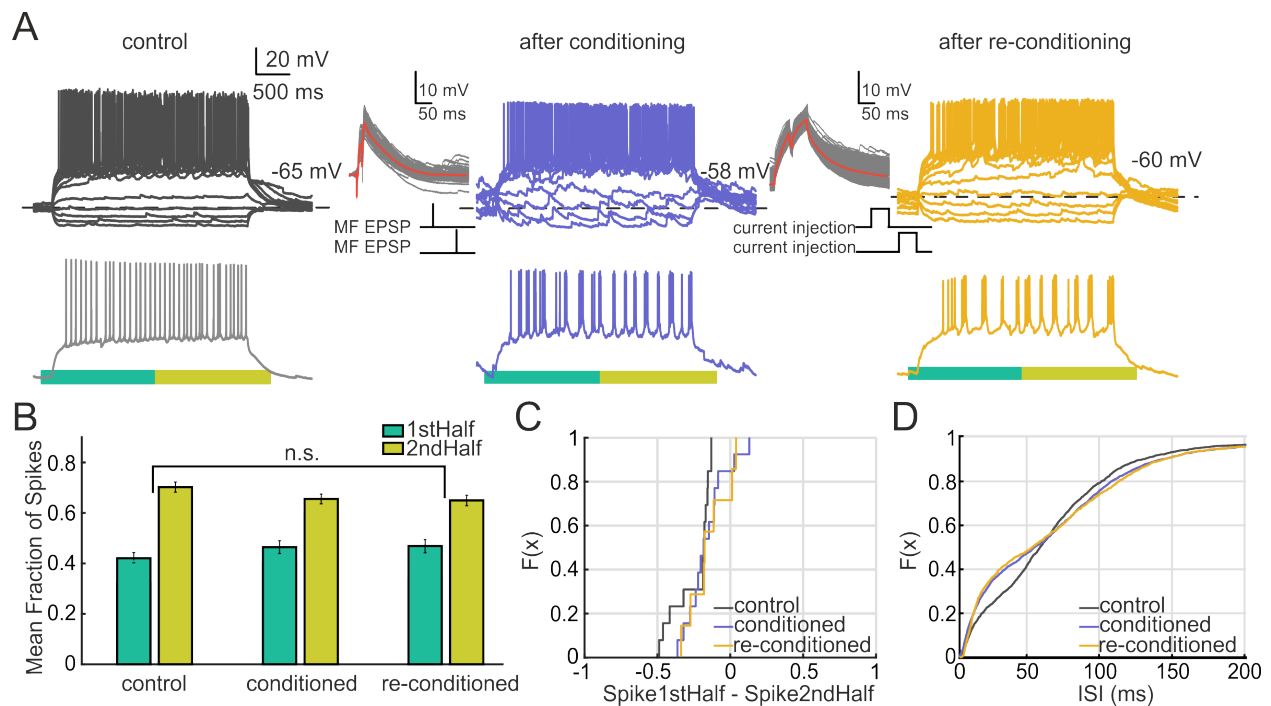

**Figure 10. Conditioning does not affect the fraction of spikes in the acute slice preparation but elicits a delay bursting response on CA3 neurons.** A) Example cell with a non adapting firing pattern in control conditions (grey). The cell is first conditioned via the mossy fiber pathway (as in Figure 1). The firing pattern of the cell changes towards delay bursting (blue). After reconditioning via somatic current pulses (as in Figure 5) the cell still presents a delay bursting response (orange). B) Mean fraction of spikes for the population in the first and second half of the voltage trace during the successive conditionings. There is no significant redistribution of the fraction of spikes after the successive conditionings (control-conditioned,  $n = 13$ ,  $p=0.09$ , two-sided Wilcoxon signed rank test) (control-re-conditioned,  $n = 13$ ,  $p=0.4$ , two-sided Wilcoxon signed rank test) C) Empirical cumulative distribution Function for the data shown in B. The number of spikes for the first half of the trace minus the spikes for the second half is shown for every cell. D) Cumulative Distribution Function of the ISIs of the cells on each group. An increase of ISIs below 50 ms is observed after conditioning. Conditioned distributions are significantly different to control (control-conditioned,  $n=13$ ,  $p= 3.34e-13$ , Two-sample Kolmogorov-Smirnov test) (control-re-conditioned,  $n=13$ ,  $p= 2.05e-14$ , Two-sample Kolmogorov-Smirnov test).

492 PKC inhibitors, indicating that phosphorylation over the few minutes of conditioning is necessary for the changes in  
493 firing pattern. Hierarchical cluster analysis showed that the transitions observed are more likely towards adapting and  
494 intrinsic burst responses. Using a conductance-based neuron model and pharmacological blocking, we found that this  
495 shift can be explained by recruitment of calcium and M-type potassium conductances. These results indicate that the  
496 intrinsic firing pattern of CA3 neurons on the time scale of seconds is shaped by the history of ongoing subthreshold  
497 activity on a longer time scale.

#### 498 **A novel form of plasticity shapes the intrinsic firing pattern of CA3 neurons**

499 Neurons are plastic elements that can adjust their excitability by tuning membrane conductances in response to network  
500 activity (Turrigiano et al., 1994; Desai et al., 1999; Fan et al., 2005). This phenomena has been well characterized  
501 in the context of homeostatic plasticity (Turrigiano and Nelson, 2004). However, the time scale of those mechanisms  
502 typically extends over hours, and involves processes of gene expression (Lee et al., 2005), whereas in our experiments  
503 the changes were observed after only a few minutes of conditioning. Furthermore, we show that the effect is abolished  
504 by blocking phosphorylation, which also points towards a faster plasticity mechanism. More recent studies indicate  
505 that changes in intrinsic excitability occur on faster time scales (Aizenman and Linden, 2000; Paz et al., 2009; Mahon  
506 and Charpier, 2012; Brager and Johnston, 2007; Hyun et al., 2013). The variables considered are generally the firing  
507 rate or threshold of the cell, which are thought to facilitate synaptic hebbian learning (Titley et al., 2017) . The neurons  
508 in our study significantly adapt their spiking dynamics, adding an extra dimension to the previous reports.

509 Most of the work on intrinsic plasticity require that the cell fire during the conditioning, whereas we observe that  
510 the firing patterns are modulated just by subthreshold input. Golowasch et al. (1999) already demonstrated that  
511 subthreshold current pulses could modulate the currents of lobster ganglion neurons, and so their discharge. However,  
512 this change required hours of stimulation. Brown and Randall (2009) and Sánchez-Aguilera et al. (2014) reported that  
513 subthreshold pulses or constant subthreshold depolarization increases the first ISI or reduces the overall excitability of  
514 the cell a few minutes after conditioning. In line with this work, Brown and Randall (2009) also reported that transient  
515 depolarizing pulses are more effective for the induction. Finally, other studies have shown that intrinsic cell properties

516 can be affected by different neuromodulators (Brager and Johnston, 2007; Graves et al., 2012; Fujisawa et al., 2005).

517 However, our changes were induced after direct subthreshold somatic conditioning, ruling out a synaptic cause.

518 The studies cited here were performed both in acute slices and in organotypic cultures. We find that the conditioning  
519 had a different effect on these two preparations, with acute neurons switching to delay burst responses (similar to  
520 Graves et al. (2012)). These discrepancies may be given by a different channel distribution and kinetics, the species  
521 employed, the developmental time point or the activity levels of the two preparations (Kapoor et al., 1988; Moody  
522 and Bosma, 2005; Okamoto et al., 2014). As novel neurocentric forms of plasticity are being unraveled in behaving  
523 animals (Titley et al., 2017), further studies will be needed to understand the firing pattern effect on the complex  
524 dynamics of circuits *in vivo*.

### 525 **Mechanisms of firing pattern transitions**

526 Our modeling and pharmacological study suggests that the conductances supporting transitions through the firing  
527 pattern space of CA3 cells are *gKd*, *gKm* and *gCa* (coupled with *gCaK*). These candidates have previously been  
528 reported to shape the spiking response of hippocampal cells via activity dependent mechanisms. For example, *gCaT*  
529 is strongly associated with the switch to bursting mode upon status epilepticus (Kim et al., 2001; Su et al., 2002),  
530 while *gKd* is modulated by activity and influence the delay firing of the cell (Cudmore et al., 2010; Hyun et al.,  
531 2013; Saviane et al., 2003). Modulation of the M-type current upon activity has also been shown in CA1 (Wu et al.,  
532 2008) and in CA3 (Brown and Randall, 2009). Furthermore, rapid up- or down-regulation of ion channel maximal  
533 conductances via phosphorylation or vesicle modulation due to calcium signaling has been demonstrated extensively  
534 (Flavell and Greenberg, 2008; Davis et al., 2001; Zhang and Linden, 2003) and it has also been shown that the channels  
535 possess a complex of scaffold proteins containing protein kinases that could selectively regulate their conductance  
536 through phosphorylation (Davis et al., 2001). The exact rules that link the subthreshold input to the recruitment of  
537 the different conductances could depend on calcium dynamics and possibly the activation properties of the involved  
538 channels (Turrigiano and Nelson, 2004; Stemmler and Koch, 1999).

539 One of the typical transitions that we observe is the switch towards bursting behaviors. We emphasize that this is

540 not the only transition induced, but rather that special attention should be given to this bursting mechanism. It is  
541 known that some neurons present this dual behavior. For example, relay cells on the thalamus become bursty upon  
542 hyperpolarization because of T-type conductance inactivation (Sherman, 2001). In our case, the cells depolarized 5  
543 mV in average, while kinase inhibitors blocked the effect, ruling out this hyperpolarizing cause.

#### 544 **Functional implications of firing pattern modulation**

545 Similar firing patterns are found in multiple species within the animal phyla (McCormick et al., 1985; Turrigiano  
546 et al., 1994; Yao and Wu, 2001), suggesting that they have a fundamental role in network computation. Shin et  
547 al. (1999) proposed that neurons that can dynamically adapt their output firing in response to their input statistics  
548 would have important advantages. By adjusting its threshold and dynamic range upon activity, a neuron could respond  
549 to stimuli over a broad range of amplitudes and frequencies without compromising sensitivity, maximizing the mutual  
550 information between its input and output discharge (Stemmler and Koch, 1999). Spike frequency accommodation has  
551 the characteristics of a high-pass filter (Benda and Herz, 2003). Since our conditioning stimuli occurred at constant  
552 frequencies, cells may have recruited a specific set of conductances that shift their integration properties to gain  
553 sensitivity in the new frequency range. Differences in filtering properties of brain stem neurons have also been shown to  
554 facilitate the extraction of spatial information from natural sounds (Remme et al., 2014) and most of the conductances  
555 that we identify in this study have reported to be frequency resonance candidates (Hutcheon and Yarom, 2000; Hu et  
556 al., 2002; Schreiber et al., 2004). These resonance properties of cells may also have important functional implications  
557 for neural activity and brain rhythms (Llinás, 1988; Buzsáki and Draguhn, 2004). When adjusting their discharge  
558 to more adapting patterns neurons may be changing mode from integrator to a coincidence detector (Prescott et al.,  
559 2008), helping not only to detect synchrony but also to transmit it to the network (Cudmore et al., 2010). Additionally,  
560 this fast plasticity of the firings may also be important for specific memory acquisition on the hippocampus (Kumaran  
561 et al., 2016; Benna and Fusi, 2016). CA3 is thought to be the generator of sharp wave ripples (SPW-R), a state  
562 where neurons cooperatively switch to presumably transfer memories to cortex (Buzsáki, 2015; Kumaran et al., 2016;  
563 Hunt et al., 2018). The stimulation protocol -resembling a SPW-R- may have push CA3 neurons to move to a different  
564 network state, similarly to Fujisawa et al. (2005), by possibly sensing the inputs and changing their spiking properties

565 based on intrinsic plasticity rules (Srikanth and Narayanan, 2015).

566 Further studies will be needed in order to unravel the role that such firing pattern transitions may have for computations  
567 in neural circuits. A first step towards this goal must be to explore more generally how the form and frequency spectrum  
568 of somatic input signals on the long time scale affect the distinct firing patterns that neurons exhibit on the short scale.  
569 It appears that, after decades of study and cataloging these patterns, the mystery is not whether they conform to classes  
570 or to a continuum but rather, what internal rules and computational advantages are that result neurons to converge onto  
571 these different discharge states.

## 572 **Bibliography**

574 Aizenman CD, Linden DJ (2000) Rapid, synaptically driven increases in the intrinsic excitability of cerebellar deep  
573 nuclear neurons. *Nature neuroscience* 3:109–111.  
575

576 Ascoli GA, Alonso-Nanclares L, Anderson SA, Barrionuevo G, Benavides-Piccione R, Burkhalter A, Buzsáki G,  
577 Cauli B, DeFelipe J, Fairén A et al. (2008) Petilla terminology: nomenclature of features of gabaergic interneurons  
578 of the cerebral cortex. *Nature Reviews Neuroscience* 9:557–568.

579 Belmeguenai A, Hosy E, Bengtsson F, Pedroarena CM, Piochon C, Teuling E, He Q, Ohtsuki G, De Jeu MT, Elgersma  
580 Y et al. (2010) Intrinsic plasticity complements long-term potentiation in parallel fiber input gain control in cerebellar  
581 purkinje cells. *Journal of Neuroscience* 30:13630–13643.

582 Benda J, Herz AV (2003) A universal model for spike-frequency adaptation. *Neural computation* 15:2523–2564.

583 Benna MK, Fusi S (2016) Computational principles of synaptic memory consolidation. *Nature neuroscience* .

584 Berndt DJ, Clifford J (1994) Using dynamic time warping to find patterns in time series. In *KDD workshop*, Vol. 10,  
585 pp. 359–370. Seattle, WA.

586 Brager DH, Johnston D (2007) Plasticity of intrinsic excitability during long-term depression is mediated through  
587 mglur-dependent changes in ih in hippocampal ca1 pyramidal neurons. *Journal of Neuroscience* 27:13926–13937.

- 588 Brandalise F, Carta S, Helmchen F, Lisman J, Gerber U (2016) Dendritic nmda spikes are necessary for  
589 timing-dependent associative ltp in ca3 pyramidal cells. *Nature Communications* 7:13480.
- 590 Brandalise F, Gerber U (2014) Mossy fiber-evoked subthreshold responses induce timing-dependent plasticity at  
591 hippocampal ca3 recurrent synapses. *Proceedings of the National Academy of Sciences* 111:4303–4308.
- 592 Brown JT, Randall AD (2009) Activity-dependent depression of the spike after-depolarization generates long-lasting  
593 intrinsic plasticity in hippocampal ca3 pyramidal neurons. *The Journal of physiology* 587:1265–1281.
- 594 Butt SJ, Fuccillo M, Nery S, Noctor S, Kriegstein A, Corbin JG, Fishell G (2005) The temporal and spatial origins  
595 of cortical interneurons predict their physiological subtype. *Neuron* 48:591–604.
- 596 Buzsáki G (2015) Hippocampal sharp wave-ripple: A cognitive biomarker for episodic memory and planning.  
597 *Hippocampus* 25:1073–1188.
- 598 Buzsáki G, Draguhn A (2004) Neuronal oscillations in cortical networks. *Science* 304:1926–1929.
- 599 Cauli B, Porter JT, Tsuzuki K, Lambolez B, Rossier J, Quenet B, Audinat E (2000) Classification of  
600 fusiform neocortical interneurons based on unsupervised clustering. *Proceedings of the National Academy of*  
601 *Sciences* 97:6144–6149.
- 602 Cohen S, Greenberg ME (2008) Communication between the synapse and the nucleus in neuronal development,  
603 plasticity, and disease. *Annual review of cell and developmental biology* 24:183–209.
- 604 Connors BW, Gutnick MJ (1990) Intrinsic firing patterns of diverse neocortical neurons. *Trends in*  
605 *neurosciences* 13:99–104.
- 606 Cooley J, Dodge F (1966) Digital computer solutions for excitation and propagation of the nerve impulse. *Biophysical*  
607 *journal* 6:583–599.
- 608 Cudmore RH, Fronzaroli-Molinieres L, Giraud P, Debanne D (2010) Spike-time precision and network synchrony are  
609 controlled by the homeostatic regulation of the d-type potassium current. *Journal of Neuroscience* 30:12885–12895.

- 610 Davis MJ, Wu X, Nurkiewicz TR, Kawasaki J, Gui P, Hill MA, Wilson E (2001) Regulation of ion channels by protein  
611 tyrosine phosphorylation. *American Journal of Physiology-Heart and Circulatory Physiology* 281:H1835–H1862.
- 612 De Schutter E, Bower JM (1994) An active membrane model of the cerebellar purkinje cell. i. simulation of current  
613 clamps in slice. *Journal of neurophysiology* 71:375–400.
- 614 DeFelipe J (1993) Neocortical neuronal diversity: chemical heterogeneity revealed by colocalization studies  
615 of classic neurotransmitters, neuropeptides, calcium-binding proteins, and cell surface molecules. *Cerebral*  
616 *Cortex* 3:273–289.
- 617 Dehorter N, Ciceri G, Bartolini G, Lim L, del Pino I, Marín O (2015) Tuning of fast-spiking interneuron properties  
618 by an activity-dependent transcriptional switch. *Science* 349:1216–1220.
- 619 Desai NS, Rutherford LC, Turrigiano GG (1999) Plasticity in the intrinsic excitability of cortical pyramidal neurons.  
620 *Nature neuroscience* 2:515–520.
- 621 Druckmann S, Hill S, Schürmann F, Markram H, Segev I (2013) A hierarchical structure of cortical interneuron  
622 electrical diversity revealed by automated statistical analysis. *Cerebral Cortex* 23:2994–3006.
- 623 Dumitriu D, Cossart R, Huang J, Yuste R (2007) Correlation between axonal morphologies and synaptic input  
624 kinetics of interneurons from mouse visual cortex. *Cerebral cortex* 17:81–91.
- 625 Fan Y, Fricker D, Brager DH, Chen X, Lu HC, Chitwood RA, Johnston D (2005) Activity-dependent decrease of  
626 excitability in rat hippocampal neurons through increases in ih. *Nature neuroscience* 8:1542–1551.
- 627 Flavell SW, Greenberg ME (2008) Signaling mechanisms linking neuronal activity to gene expression and plasticity  
628 of the nervous system. *Annual review of neuroscience* 31:563.
- 629 Fujisawa S, Matsuki N, Ikegaya Y (2005) Single neurons can induce phase transitions of cortical recurrent networks  
630 with multiple internal states. *Cerebral Cortex* 16:639–654.
- 631 Gähwiler B (1981) Organotypic monolayer cultures of nervous tissue. *Journal of neuroscience methods* 4:329–342.
- 632 Gähwiler B (1988) Organotypic cultures of neural tissue. *Trends in neurosciences* 11:484–489.

- 633 García NVDM, Karayannis T, Fishell G (2011) Neuronal activity is required for the development of specific cortical  
634 interneuron subtypes. *Nature* 472:351–355.
- 635 Golowasch J, Abbott L, Marder E (1999) Activity-dependent regulation of potassium currents in an identified neuron  
636 of the stomatogastric ganglion of the crab *Cancer borealis*. *Journal of Neuroscience* 19:RC33–1.
- 637 Graves AR, Moore SJ, Bloss EB, Mensh BD, Kath WL, Spruston N (2012) Hippocampal pyramidal neurons comprise  
638 two distinct cell types that are countermodulated by metabotropic receptors. *Neuron* 76:776–789.
- 639 Hemond P, Epstein D, Boley A, Migliore M, Ascoli GA, Jaffe DB (2008) Distinct classes of pyramidal cells exhibit  
640 mutually exclusive firing patterns in hippocampal area ca3b. *Hippocampus* 18:411–424.
- 641 Hille B (2001) *Ion channels of excitable membranes*, Vol. 507 Sinauer Sunderland, MA.
- 642 Hines ML, Carnevale NT (1997) The neuron simulation environment. *Neural computation* 9:1179–1209.
- 643 Hosp JA, Strüber M, Yanagawa Y, Obata K, Vida I, Jonas P, Bartos M (2014) Morpho-physiological criteria divide  
644 dentate gyrus interneurons into classes. *Hippocampus* 24:189–203.
- 645 Hu H, Vervaeke K, Storm JF (2002) Two forms of electrical resonance at theta frequencies, generated by m-current,  
646 h-current and persistent na<sup>+</sup> current in rat hippocampal pyramidal cells. *The Journal of physiology* 545:783–805.
- 647 Hunt D, Linaro D, Si B, Romani S, Spruston N (2018) A novel pyramidal cell type promotes sharp-wave  
648 synchronization in the hippocampus. *Nature neuroscience* .
- 649 Hutcheon B, Yarom Y (2000) Resonance, oscillation and the intrinsic frequency preferences of neurons. *Trends in*  
650 *neurosciences* 23:216–222.
- 651 Hyun JH, Eom K, Lee KH, Ho WK, Lee SH (2013) Activity-dependent downregulation of d-type k<sup>+</sup> channel subunit  
652 kv1. 2 in rat hippocampal ca3 pyramidal neurons. *The Journal of physiology* 591:5525–5540.
- 653 Kapoor R, Jaeger C, Llinas R (1988) Electrophysiology of the mammalian cerebellar cortex in organ culture.  
654 *Neuroscience* 26:493–507.



- 655 Kawaguchi Y, Kubota Y (1997) Gabaergic cell subtypes and their synaptic connections in rat frontal cortex. *Cerebral*  
656 *cortex* 7:476–486.
- 657 Keogh E, Ratanamahatana CA (2005) Exact indexing of dynamic time warping. *Knowledge and information*  
658 *systems* 7:358–386.
- 659 Kim D, Song I, Keum S, Lee T, Jeong MJ, Kim SS, McEnery MW, Shin HS (2001) Lack of the burst firing  
660 of thalamocortical relay neurons and resistance to absence seizures in mice lacking  $\alpha$  1g t-type ca<sup>2+</sup> channels.  
661 *Neuron* 31:35–45.
- 662 Kochegarov AA (2003) Pharmacological modulators of voltage-gated calcium channels and their therapeutical  
663 application. *Cell calcium* 33:145–162.
- 664 Kumaran D, Hassabis D, McClelland JL (2016) What learning systems do intelligent agents need? complementary  
665 learning systems theory updated. *Trends in cognitive sciences* 20:512–534.
- 666 Lee PR, Cohen JE, Becker KG, Fields RD (2005) Gene expression in the conversion of early-phase to late-phase  
667 long-term potentiation. *Annals of the New York Academy of Sciences* 1048:259–271.
- 668 Llinás RR (1988) The intrinsic electrophysiological properties of mammalian neurons: insights into central nervous  
669 system function. *Science* 242:1654–1664.
- 670 Luthi A, Gähwiler BH, Gerber U (1996) A slowly inactivating potassium current in ca3 pyramidal cells of rat  
671 hippocampus in vitro. *Journal of Neuroscience* 16:586–594.
- 672 Mahon S, Charpier S (2012) Bidirectional plasticity of intrinsic excitability controls sensory inputs efficiency in layer  
673 5 barrel cortex neurons in vivo. *Journal of Neuroscience* 32:11377–11389.
- 674 Marder E, Goaillard JM (2006) Variability, compensation and homeostasis in neuron and network function. *Nature*  
675 *Reviews Neuroscience* 7:563–574.
- 676 Markram H, Toledo-Rodriguez M, Wang Y, Gupta A, Silberberg G, Wu C (2004) Interneurons of the neocortical  
677 inhibitory system. *Nature Reviews Neuroscience* 5:793–807.

- 678 McCormick DA, Connors BW, Lighthall JW, Prince DA (1985) Comparative electrophysiology of pyramidal and  
679 sparsely spiny stellate neurons of the neocortex. *Journal of neurophysiology* 54:782–806.
- 680 Miller MN, Okaty BW, Nelson SB (2008) Region-specific spike-frequency acceleration in layer 5 pyramidal neurons  
681 mediated by kv1 subunits. *Journal of Neuroscience* 28:13716–13726.
- 682 Moody WJ, Bosma MM (2005) Ion channel development, spontaneous activity, and activity-dependent development  
683 in nerve and muscle cells. *Physiological reviews* 85:883–941.
- 684 Okamoto K, Ishikawa T, Abe R, Ishikawa D, Kobayashi C, Mizunuma M, Norimoto H, Matsuki N, Ikegaya Y  
685 (2014) Ex vivo cultured neuronal networks emit in vivo-like spontaneous activity. *The Journal of Physiological  
686 Sciences* 64:421–431.
- 687 Paz JT, Mahon S, Tiret P, Genet S, Delord B, Charpier S (2009) Multiple forms of activity-dependent intrinsic  
688 plasticity in layer v cortical neurones in vivo. *The Journal of physiology* 587:3189–3205.
- 689 Prescott SA, Ratté S, De Koninck Y, Sejnowski TJ (2008) Pyramidal neurons switch from integrators in vitro to  
690 resonators under in vivo-like conditions. *Journal of neurophysiology* 100:3030–3042.
- 691 Ramón y Cajal D (1893) Nuevo concepto de la histología de los centros nerviosos .
- 692 Remme MW, Donato R, Mikiel-Hunter J, Ballesterro JA, Foster S, Rinzel J, McAlpine D (2014) Subthreshold  
693 resonance properties contribute to the efficient coding of auditory spatial cues. *Proceedings of the National Academy  
694 of Sciences* 111:E2339–E2348.
- 695 Ren J, Aika Y, Heizmann C, Kosaka T (1992) Quantitative analysis of neurons and glial cells in the rat somatosensory  
696 cortex, with special reference to gabaergic neurons and parvalbumin-containing neurons. *Experimental brain  
697 research* 92:1–14.
- 698 Sánchez-Aguilera A, Sánchez-Alonso J, Vicente-Torres M, Colino A (2014) A novel short-term plasticity of intrinsic  
699 excitability in the hippocampal ca1 pyramidal cells. *The Journal of physiology* 592:2845–2864.

- 700 Saviane C, Mohajerani MH, Cherubini E (2003) An id-like current that is downregulated by  $ca_2^+$  modulates  
701 information coding at  $ca_3$ – $ca_3$  synapses in the rat hippocampus. *The Journal of physiology* 552:513–524.
- 702 Schreiber S, Fellous JM, Tiesinga P, Sejnowski TJ (2004) Influence of ionic conductances on spike timing reliability  
703 of cortical neurons for suprathreshold rhythmic inputs. *Journal of neurophysiology* 91:194–205.
- 704 Sherman SM (2001) Tonic and burst firing: dual modes of thalamocortical relay. *Trends in*  
705 *neurosciences* 24:122–126.
- 706 Shin J, Koch C, Douglas R (1999) Adaptive neural coding dependent on the time-varying statistics of the somatic  
707 input current. *Neural computation* 11:1893–1913.
- 708 Somogyi P, Klausberger T (2005) Defined types of cortical interneurone structure space and spike timing in the  
709 hippocampus. *The Journal of physiology* 562:9–26.
- 710 Srikanth S, Narayanan R (2015) Variability in state-dependent plasticity of intrinsic properties during  
711 cell-autonomous self-regulation of calcium homeostasis in hippocampal model neurons. *eNeuro* 2:ENEURO–0053.
- 712 Stemmler M, Koch C (1999) How voltage-dependent conductances can adapt to maximize the information encoded  
713 by neuronal firing rate. *Nature neuroscience* 2:521–527.
- 714 Steriade M (2004) Neocortical cell classes are flexible entities. *Nature reviews neuroscience* 5:121–134.
- 715 Storm JF (1988) Temporal integration by a slowly inactivating  $k^+$  current in hippocampal neurons. *Nature* 336:379.
- 716 Su H, Sochivko D, Becker A, Chen J, Jiang Y, Yaari Y, Beck H (2002) Upregulation of a t-type  $ca_2^+$  channel causes a  
717 long-lasting modification of neuronal firing mode after status epilepticus. *The Journal of neuroscience* 22:3645–3655.
- 718 Tasic B, Menon V, Nguyen TN, Kim TK, Jarsky T, Yao Z, Levi B, Gray LT, Sorensen SA, Dolbeare T et al. (2016)  
719 Adult mouse cortical cell taxonomy revealed by single cell transcriptomics. *Nature neuroscience* 19:335–346.
- 720 Thompson L, Moyer J, Disterhoft J (1996) Transient changes in excitability of rabbit  $ca_3$  neurons with a time course  
721 appropriate to support memory consolidation. *Journal of Neurophysiology* 76:1836–1849.

- 722 Titley HK, Brunel N, Hansel C (2017) Toward a neurocentric view of learning. *Neuron* 95:19–32.
- 723 Tricoire L, Pelkey KA, Erkkila BE, Jeffries BW, Yuan X, McBain CJ (2011) A blueprint for the spatiotemporal  
724 origins of mouse hippocampal interneuron diversity. *The Journal of Neuroscience* 31:10948–10970.
- 725 Turrigiano G, Abbott L, Marder E (1994) Activity-dependent changes in the intrinsic properties of cultured neurons.  
726 *Science-AAAS-Weekly Paper Edition-including Guide to Scientific Information* 264:974–976.
- 727 Turrigiano GG, Nelson SB (2004) Homeostatic plasticity in the developing nervous system. *Nature Reviews*  
728 *Neuroscience* 5:97–107.
- 729 Van Aerde KI, Feldmeyer D (2015) Morphological and physiological characterization of pyramidal neuron subtypes  
730 in rat medial prefrontal cortex. *Cerebral cortex* 25:788–805.
- 731 Ward Jr JH (1963) Hierarchical grouping to optimize an objective function. *Journal of the American statistical*  
732 *association* 58:236–244.
- 733 Wu WW, Chan CS, Surmeier DJ, Disterhoft JF (2008) Coupling of l-type ca<sup>2+</sup> channels to kv7/kcnq channels creates  
734 a novel, activity-dependent, homeostatic intrinsic plasticity. *Journal of neurophysiology* 100:1897–1908.
- 735 Yao WD, Wu CF (2001) Distinct roles of camkii and pka in regulation of firing patterns and k<sup>+</sup> currents in drosophila  
736 neurons. *Journal of neurophysiology* 85:1384–1394.
- 737 Zhang W, Linden DJ (2003) The other side of the engram: experience-driven changes in neuronal intrinsic  
738 excitability. *Nature Reviews Neuroscience* 4:885–900.
